# Supplementary material for: Identification of novel functional CpG-SNPs associated with Type 2 diabetes and birth weight
Source: publisher site journal article supplement (doi:10.18632/aging.202828), 2021-04-04
Supplement: Supplementary file [file aging-v13i7-202828-supplementary-material-SD3.pdf]

## SUPPLEMENTARY TABLES

**Supplementary Table 1. Conditional FDR value of 127 CpG-SNPs for T2DM given the BW (cFDR < 0.05)**

| Variant    | chr | Pos       | Alt | Gene                    | Annotation                             | Snps Type | Gene Type | eQTL/<br>meQTL/<br>metaQTL | P        | cFDR     |
|------------|-----|-----------|-----|-------------------------|----------------------------------------|-----------|-----------|----------------------------|----------|----------|
| rs10449766 | 1   | 42070125  | A/G | HNRNPFP1                | 28396 upstream                         | novel     | novel     |                            | 2.60E-03 | 4.99E-02 |
| rs1415991  | 1   | 219625290 | A/G | ZC3H11B                 | 12145 upstream                         | novel     | novel     |                            | 8.60E-06 | 7.40E-03 |
| rs340883   | 1   | 213972363 | C/T | PROX1-AS1               | non-coding intronic                    | confirmed | novel     |                            | 3.80E-07 | 7.04E-05 |
| rs7553890  | 1   | 213832562 | T/C | PROX1-AS1               | non-coding                             | novel     | novel     |                            | 2.20E-03 | 1.89E-02 |
| rs1515114  | 2   | 226233671 | A/G | AC062015.1              | 48.3kb upstream                        | novel     | novel     | eQTL                       | 1.80E-04 | 8.17E-03 |
| rs1522812  | 2   | 226132738 | A/G | AC062015.1              | 47306 downstream                       | novel     | novel     | eQTL                       | 9.30E-06 | 7.43E-04 |
| rs2894593  | 2   | 226325601 | T/C | AC062015.1              | 140230 upstream                        | novel     | novel     | eQTL                       | 4.90E-04 | 9.16E-03 |
| rs7605661  | 2   | 43397939  | T/C | THADA                   | intronic                               | novel     | confirmed | meQTL                      | 1.30E-05 | 3.21E-04 |
| rs12631028 | 3   | 12299907  | C/T | PPARG                   | intronic                               | novel     | confirmed | eQTL/meQTL                 | 4.90E-05 | 4.81E-02 |
| rs17013266 | 3   | 23449390  | A/G | UBE2E2                  | intronic                               | novel     | confirmed |                            | 1.90E-04 | 4.85E-02 |
| rs17361324 | 3   | 123412407 | C/T | ADCY5                   | intronic                               | novel     | confirmed | meQTL                      | 2.80E-09 | 8.40E-09 |
| rs2290066  | 3   | 185728054 | T/C | IGF2BP2,<br>IGF2BP2-AS1 | intronic, non-coding<br>intronic       | novel     | confirmed | eQTL                       | 4.90E-05 | 3.82E-02 |
| rs4677887  | 3   | 123381376 | T/G | ADCY5                   | intronic                               | confirmed | confirmed | eQTL                       | 3.40E-06 | 6.80E-06 |
| rs4677889  | 3   | 123424425 | G/A | ADCY5                   | intronic                               | novel     | confirmed |                            | 2.00E-03 | 2.53E-02 |
| rs569255   | 3   | 125207090 | G/A | SLC12A8                 | intronic                               | novel     | novel     | eQTL                       | 1.70E-03 | 2.27E-02 |
| rs6770420  | 3   | 170931960 | G/A | KLF7P1                  | 20890 downstream                       | novel     | novel     | eQTL/metaQTL               | 2.40E-05 | 1.75E-03 |
| rs6794193  | 3   | 47073414  | T/C | SETD2                   | intronic                               | novel     | novel     |                            | 6.60E-03 | 3.92E-02 |
| rs6795735  | 3   | 64719689  | C/T | ADAMTS9-AS2             | non-coding intronic                    | confirmed | novel     |                            | 2.10E-08 | 3.85E-05 |
| rs720390   | 3   | 185830895 | G/A | IGF2BP2                 | 5839 upstream                          | confirmed | confirmed |                            | 1.40E-05 | 1.42E-02 |
| rs9289218  | 3   | 123345984 | C/T | ADCY5                   | intronic                               | novel     | confirmed | eQTL                       | 2.50E-03 | 1.60E-02 |
| rs11097755 | 4   | 101788151 | T/C | BANK1                   | intronic                               | novel     | novel     |                            | 1.60E-06 | 1.37E-03 |
| rs1216373  | 4   | 128576009 | C/T | AC078850.1              | 5478 upstream                          | novel     | novel     | metaQTL                    | 6.60E-05 | 1.07E-02 |
| rs3822109  | 4   | 75012761  | C/T | PARM1,<br>AC110760.1    | coding nonsyn, non-<br>coding intronic | novel     | novel     |                            | 3.20E-05 | 2.21E-02 |
| rs6446490  | 4   | 6322920   | G/A | PPP2R2C                 | 3utr                                   | confirmed | novel     | eQTL/meQTL                 | 1.70E-10 | 1.33E-06 |
| rs7663887  | 4   | 17901297  | C/A | LCORL                   | intronic                               | novel     | novel     | eQTL                       | 8.80E-03 | 1.89E-02 |
| rs10514870 | 5   | 59055501  | A/G | PDE4D,<br>AC092343.1    | intronic, non-coding<br>intronic       | novel     | novel     |                            | 4.20E-03 | 2.18E-02 |
| rs1650504  | 5   | 158602542 | G/A | AC091939.1              | 13996 upstream                         | novel     | novel     |                            | 8.10E-05 | 9.88E-03 |
| rs6867983  | 5   | 56558326  | C/T | C5orf67                 | intronic                               | novel     | confirmed |                            | 7.80E-06 | 9.07E-03 |
| rs1012635  | 6   | 20675064  | A/G | CDKAL1                  | intronic                               | confirmed | confirmed |                            | 4.40E-15 | 2.64E-14 |
| rs12526403 | 6   | 41676676  | C/T | TFEB                    | 7302 downstream                        | novel     | novel     |                            | 1.90E-03 | 4.50E-02 |
| rs1262557  | 6   | 126733443 | C/T | RPS4XP9                 | 49596 upstream                         | novel     | novel     |                            | 6.20E-05 | 8.80E-03 |
| rs2206734  | 6   | 20694653  | C/T | CDKAL1                  | intronic                               | novel     | confirmed | meQTL                      | 2.40E-27 | 9.60E-27 |
| rs2307306  | 6   | 24781507  | C/T | GMNN                    | coding nonsyn                          | novel     | novel     | eQTL                       | 3.00E-05 | 1.82E-02 |
| rs2745929  | 6   | 20754530  | T/C | CDKAL1                  | intronic                               | novel     | confirmed |                            | 4.50E-10 | 2.10E-09 |
| rs4897378  | 6   | 130217352 | C/T | SAMD3                   | 5upstream, intronic                    | novel     | novel     | eQTL                       | 4.80E-03 | 4.54E-02 |
| rs6918311  | 6   | 136966564 | A/G | RPL35AP3                | 7366 downstream                        | confirmed | novel     | eQTL/meQTL                 | 6.70E-07 | 1.16E-03 |
| rs6941340  | 6   | 16037321  | C/T | AL365265.1              | 4060 downstream                        | novel     | novel     |                            | 6.70E-05 | 4.75E-02 |
| rs10244051 | 7   | 15024208  | T/G | GTF3AP5                 | 38.1kb upstream                        | novel     | novel     |                            | 2.40E-08 | 2.54E-05 |
| rs17158736 | 7   | 111692378 | G/C | DOCK4                   | 33732 downstream                       | novel     | novel     |                            | 3.40E-05 | 3.89E-02 |
| rs17689040 | 7   | 40880714  | C/G | SUGCT                   | 19951 upstream                         | novel     | novel     |                            | 2.70E-03 | 3.04E-02 |
| rs6948511  | 7   | 27939096  | T/C | JAZF1                   | intronic                               | novel     | confirmed | metaQTL                    | 5.70E-03 | 4.02E-02 |

|            |    |           |     |                    |                      |           |                     |                        |          |          |
|------------|----|-----------|-----|--------------------|----------------------|-----------|---------------------|------------------------|----------|----------|
| rs7723     | 7  | 44578194  | G/A | TMED4              | 3utr,3downstream     | confirmed | novel               | eQTL/metaQTL           | 2.50E-05 | 4.22E-04 |
| rs7787720  | 7  | 13847029  | C/T | AC005019.2         | 7326 downstream      | confirmed | novel               | eQTL/meQTL/<br>metaQTL | 4.00E-06 | 3.66E-03 |
| rs849135   | 7  | 28156794  | G/A | JAZF1              | intronic             | confirmed | novel               | eQTL/meQTL             | 6.60E-14 | 5.04E-10 |
| rs1033129  | 8  | 138257741 | T/C | FAM135B            | intronic             | novel     | confirmed           |                        | 4.70E-05 | 6.92E-03 |
| rs2466311  | 8  | 117208857 | G/C | SLC30A8            | 32143 upstream       | novel     | confirmed           |                        | 1.20E-08 | 3.28E-05 |
| rs7004862  | 8  | 94864735  | T/G | INTS8              | intronic             | novel     | confirmed           | eQTL/metaQTL           | 5.50E-05 | 2.26E-03 |
| rs7816345  | 8  | 36988591  | C/T | AC090453.1         | 179 upstream         | novel     | novel               | eQTL/metaQTL           | 2.30E-03 | 2.68E-02 |
| rs10739970 | 9  | 94134010  | A/G | PTPDC1             | 24154 upstream       | novel     | novel               |                        | 9.90E-04 | 3.18E-02 |
| rs10758593 | 9  | 4292083   | G/A | GLIS3              | intronic             | confirmed | novel               |                        | 2.90E-04 | 3.60E-02 |
| rs10990568 | 9  | 95651855  | A/G | AL354861.2         | non-coding intronic  | novel     | novel               |                        | 1.60E-03 | 2.46E-02 |
| rs2383208  | 9  | 22132077  | A/G | CDKN2B-AS1         | 10980 upstream       | novel     | confirmed           | metaQTL                | 4.50E-13 | 2.77E-09 |
| rs579459   | 9  | 133278724 | T/C | ABO                | 3510 upstream        | novel     | confirmed           | eQTL/meQTL/<br>metaQTL | 8.50E-07 | 8.22E-06 |
| rs7018475  | 9  | 22137686  | T/G | CDKN2B-AS1         | 16589 upstream       | novel     | confirmed           |                        | 7.20E-16 | 1.29E-11 |
| rs10786044 | 10 | 92430823  | A/G | MARK2P9            | 9948 upstream        | novel     | confirmed           | eQTL/metaQTL           | 4.00E-05 | 1.36E-02 |
| rs10885410 | 10 | 113064714 | G/A | TCF7L2             | intronic             | novel     | confirmed           |                        | 1.60E-11 | 1.61E-07 |
| rs11196229 | 10 | 113106413 | G/A | TCF7L2             | intronic             | novel     | confirmed           |                        | 5.20E-09 | 2.70E-05 |
| rs12245680 | 10 | 113060432 | T/C | TCF7L2             | intronic             | confirmed | confirmed           | meQTL                  | 1.10E-10 | 7.90E-07 |
| rs1225404  | 10 | 113154906 | C/T | TCF7L2             | intronic             | novel     | confirmed           |                        | 1.80E-07 | 4.34E-04 |
| rs1815314  | 10 | 79169036  | G/A | ZMIZ1              | intronic             | novel     | confirmed           |                        | 2.90E-05 | 4.02E-02 |
| rs1867567  | 10 | 68223370  | G/A | ATOH7              | 7254 downstream      | novel     | novel               |                        | 2.90E-04 | 4.87E-02 |
| rs190925   | 10 | 69561187  | G/A | NEUROG3            | 10511 downstream     | novel     | novel               |                        | 4.20E-05 | 9.12E-03 |
| rs2421019  | 10 | 122391070 | C/T | PLEKHA1            | 5upstream            | novel     | confirmed           | eQTL                   | 3.50E-08 | 1.17E-06 |
| rs2488071  | 10 | 92739820  | A/G | Y_RNA              | 29212 upstream       | confirmed | novel               | eQTL/metaQTL           | 3.10E-11 | 1.96E-10 |
| rs7070786  | 10 | 92363930  | C/T | MARCH5             | 9966 upstream        | novel     | novel               | eQTL                   | 1.80E-06 | 9.54E-05 |
| rs7899603  | 10 | 92465260  | G/C | IDE                | intronic             | confirmed | confirmed           | eQTL                   | 3.80E-06 | 8.59E-04 |
| rs7904519  | 10 | 113014168 | A/G | TCF7L2             | intronic             | novel     | confirmed           | eQTL/meQTL             | 3.20E-38 | 2.00E-33 |
| rs1002226  | 11 | 17384070  | C/T | AC124798.1         | 0.5kb upstream       | novel     | novel               | eQTL/meQTL             | 2.40E-06 | 2.28E-03 |
| rs11037685 | 11 | 43857990  | A/G | AC087521.2         | non-coding intronic  | novel     | novel               | eQTL                   | 1.80E-06 | 3.08E-03 |
| rs11819995 | 11 | 128519496 | C/T | ETS1               | intronic             | novel     | novel               | meQTL                  | 5.00E-05 | 2.86E-02 |
| rs12786533 | 11 | 2875083   | G/A | KCNQ1DN            | 2978 upstream        | novel     | novel               | eQTL/meQTL             | 5.20E-05 | 4.34E-02 |
| rs1447351  | 11 | 92984997  | A/G | MTNR1B             | 3utr                 | novel     | confirmed           | metaQTL                | 8.20E-05 | 1.47E-03 |
| rs151216   | 11 | 2659585   | C/T | KCNQ1,<br>KCNQ1OT1 | intronic, non-coding | novel     | confirmed,<br>novel |                        | 8.70E-07 | 1.33E-05 |
| rs163171   | 11 | 2799835   | T/C | KCNQ1              | intronic             | novel     | confirmed           | meQTL                  | 8.90E-07 | 1.95E-03 |
| rs163177   | 11 | 2817183   | T/C | KCNQ1              | intronic             | confirmed | confirmed           | eQTL                   | 2.00E-12 | 2.07E-10 |
| rs2237892  | 11 | 2818521   | C/T | KCNQ1              | intronic             | novel     | confirmed           | meQTL/metaQTL          | 1.10E-07 | 4.91E-05 |
| rs231354   | 11 | 2685121   | T/C | KCNQ1,<br>KCNQ1OT1 | intronic, non-coding | confirmed | confirmed,<br>novel | eQTL/meQTL             | 3.70E-06 | 2.40E-04 |
| rs2334499  | 11 | 1675619   | C/T | FAM99B             | 7650 downstream      | confirmed | novel               | eQTL/meQTL             | 7.30E-05 | 1.87E-02 |
| rs234857   | 11 | 2831299   | T/C | KCNQ1              | intronic             | confirmed | confirmed           |                        | 2.00E-09 | 1.09E-06 |
| rs3213225  | 11 | 2135306   | G/A | IGF2,INS-IGF2      | intronic,intronic    | novel     | confirmed           | eQTL/meQTL             | 8.10E-04 | 4.15E-03 |
| rs3852527  | 11 | 2805373   | A/G | KCNQ1              | intronic             | confirmed | confirmed           | eQTL                   | 6.20E-06 | 1.02E-02 |
| rs4937729  | 11 | 132833690 | A/C | OPCML              | intronic             | novel     | novel               |                        | 1.30E-04 | 2.80E-02 |
| rs1042725  | 12 | 65964567  | C/T | HMG2               | 3utr,3downstream     | confirmed | confirmed           | metaQTL                | 7.70E-04 | 1.54E-03 |
| rs10774202 | 12 | 4168281   | A/G | AC007207.1         | 50149 upstream       | novel     | novel               |                        | 9.50E-04 | 2.42E-02 |
| rs10774563 | 12 | 120622977 | G/A | AC125616.1         | 6634 downstream      | novel     | novel               | eQTL/metaQTL           | 3.30E-06 | 4.76E-03 |
| rs10862960 | 12 | 77030355  | C/T | E2F7               | intronic             | novel     | novel               | eQTL                   | 1.70E-03 | 2.14E-02 |

|            |    |           |     |                       |                              |           |              |              |          |          |
|------------|----|-----------|-----|-----------------------|------------------------------|-----------|--------------|--------------|----------|----------|
| rs10878353 | 12 | 65988752  | T/C | HMGA2                 | 2245 upstream                | novel     | confirmed    |              | 2.20E-03 | 5.34E-03 |
| rs1169302  | 12 | 120994499 | T/G | HNF1A                 | intronic                     | novel     | novel        | eQTL         | 2.60E-05 | 3.93E-02 |
| rs12422899 | 12 | 133115743 | T/C | ZNF891,<br>AC026786.2 | 3utr, non-coding<br>intronic | novel     | novel, novel | eQTL/meQTL   | 4.90E-05 | 3.57E-02 |
| rs192210   | 12 | 21615041  | G/A | GYS2                  | 10194 upstream               | novel     | novel        | eQTL         | 1.10E-04 | 4.89E-02 |
| rs3962536  | 12 | 22861176  | A/G | AC084816.1            | non-coding                   | novel     | novel        |              | 1.50E-04 | 4.09E-02 |
| rs4930718  | 12 | 123428886 | A/G | RILPL2                | intronic                     | novel     | novel        | eQTL         | 8.90E-04 | 6.05E-03 |
| rs12865243 | 13 | 40104683  | G/A | LINC00598             | non-coding intronic          | novel     | novel        |              | 5.80E-03 | 2.44E-02 |
| rs17202418 | 13 | 36163442  | T/C | SOHLH2                | 4766 downstream              | novel     | novel        | metaQTL      | 3.50E-05 | 1.31E-02 |
| rs2066612  | 13 | 50171259  | G/A | DLEU1                 | non-coding intronic          | novel     | novel        | eQTL/metaQTL | 2.70E-05 | 2.89E-02 |
| rs4885692  | 13 | 80066087  | C/T | AL158064.2            | non-coding intronic          | novel     | novel        |              | 2.30E-05 | 1.90E-02 |
| rs842379   | 13 | 46686202  | C/T | LRCH1                 | intronic                     | novel     | novel        |              | 1.60E-05 | 1.67E-02 |
| rs9532498  | 13 | 40104306  | G/C | LINC00598             | non-coding intronic          | novel     | novel        |              | 2.80E-03 | 2.05E-02 |
| rs10146260 | 14 | 76010803  | G/T | IFT43                 | intronic                     | novel     | novel        |              | 3.50E-05 | 1.57E-02 |
| rs1285850  | 14 | 91419362  | A/G | AL133153.2            | non-coding intronic          | confirmed | novel        | eQTL         | 5.80E-05 | 4.61E-02 |
| rs12894779 | 14 | 32835814  | G/A | AKAP6                 | 3utr                         | novel     | confirmed    |              | 2.70E-04 | 2.05E-02 |
| rs17117189 | 14 | 82713706  | G/A | LINC02301             | 6881 upstream                | novel     | novel        |              | 1.20E-04 | 4.37E-02 |
| rs11073964 | 15 | 91000531  | C/T | VPS33B                | coding nonsyn                | novel     | novel        | eQTL/meQTL   | 2.10E-06 | 3.25E-03 |
| rs1436955  | 15 | 62112183  | C/T | NPM1P47               | 28878 upstream               | novel     | novel        | eQTL         | 2.60E-05 | 2.87E-02 |
| rs2682920  | 15 | 77577575  | C/T | AC046168.2            | non-coding intronic          | novel     | novel        | eQTL         | 2.20E-05 | 1.02E-02 |
| rs7497492  | 15 | 23782133  | A/G | LOC107984793          | intronic                     | novel     | novel        |              | 1.90E-04 | 4.18E-02 |
| rs4625714  | 16 | 55607701  | C/T | LPCAT2                | 21031 upstream               | novel     | novel        |              | 1.90E-03 | 2.64E-02 |
| rs7198093  | 16 | 85193257  | A/G | GSE1                  | intronic                     | novel     | novel        |              | 3.80E-05 | 3.09E-02 |
| rs9940128  | 16 | 53766842  | G/A | FTO                   | intronic                     | confirmed | confirmed    |              | 2.60E-22 | 5.61E-18 |
| rs11651755 | 17 | 37739849  | C/T | HNF1B                 | intronic                     | confirmed | confirmed    |              | 3.40E-08 | 2.27E-05 |
| rs1402657  | 17 | 9886035   | C/T | GLP2R                 | intronic                     | novel     | confirmed    | eQTL         | 4.50E-05 | 2.78E-02 |
| rs1531798  | 17 | 78826049  | A/G | USP36                 | intronic                     | novel     | novel        | eQTL         | 9.90E-05 | 7.84E-03 |
| rs198542   | 17 | 50567176  | G/A | CACNA1G               | intronic                     | novel     | novel        |              | 5.20E-04 | 9.15E-03 |
| rs2290770  | 17 | 75834935  | G/A | UNC13D                | coding syn                   | novel     | novel        |              | 3.80E-06 | 4.72E-03 |
| rs2291725  | 17 | 48961770  | T/C | GIP                   | coding nonsyn                | novel     | confirmed    | eQTL/meQTL   | 7.10E-06 | 4.30E-03 |
| rs390200   | 17 | 7206676   | A/G | DLG4                  | intronic                     | novel     | novel        | eQTL         | 1.50E-02 | 1.88E-02 |
| rs6565531  | 17 | 81049580  | G/A | BAIAP2                | intronic                     | novel     | novel        | eQTL/meQTL   | 3.90E-04 | 1.88E-02 |
| rs878619   | 17 | 50555910  | A/G | SPATA20               | 58 upstream                  | novel     | novel        | eQTL/meQTL   | 2.00E-04 | 2.23E-03 |
| rs9303407  | 17 | 59299448  | A/G | SNRPGP17              | 18105 upstream               | novel     | novel        | eQTL         | 2.90E-04 | 3.20E-02 |
| rs11659412 | 18 | 7063533   | G/A | LAMA1                 | intronic                     | novel     | confirmed    | metaQTL      | 1.70E-06 | 5.46E-03 |
| rs7238644  | 18 | 29436831  | C/T | AC074237.1            | 74868 upstream               | novel     | novel        |              | 4.30E-05 | 3.57E-02 |
| rs1205438  | 20 | 38247165  | C/T | KIAA1755              | intronic                     | novel     | novel        | eQTL         | 1.10E-04 | 2.19E-02 |
| rs2426778  | 20 | 58718421  | G/A | NPEPL1                | non-coding                   | novel     | novel        | eQTL         | 7.70E-03 | 4.76E-02 |
| rs926345   | 20 | 41143307  | T/C | PLCG1                 | intronic                     | novel     | novel        | eQTL/meQTL   | 5.70E-03 | 3.11E-02 |
| rs11908784 | 21 | 19628605  | A/G | AP000403.1            | 7060 upstream                | novel     | novel        |              | 5.80E-05 | 2.92E-02 |
| rs137848   | 22 | 50001867  | T/C | IL17REL               | intronic                     | novel     | novel        | eQTL/meQTL   | 3.00E-06 | 3.55E-04 |
| rs6006393  | 22 | 30194037  | T/C | AC002378.1            | non-coding intronic          | confirmed | novel        |              | 2.00E-06 | 2.14E-04 |

**Supplementary Table 2. meQTL associated effects of novel CpG-SNPs**

| CpG-SNP                      | Traits      | Chr | Allele  | Gene               | Pos       | meQTL Type | P value   |
|------------------------------|-------------|-----|---------|--------------------|-----------|------------|-----------|
| rs7605661                    | Pleiotropic | 2   | T/C     | THADA              | 43397939  | cis        | 3.23E-29  |
| rs17361324                   | Pleiotropic | 3   | C/T     | ADCY5              | 123412407 | cis        | 1.77E-38  |
| rs6794193(LD to rs295442)    | Pleiotropic | 3   | T/C     | SETD2              | 47073414  | cis        | 1.06E-33  |
| rs6794193(LD to rs295458)    | Pleiotropic | 3   | T/C     | SETD2              | 47073414  | cis        | 6.79E-21  |
| rs6794193(LD to rs4078466)   | Pleiotropic | 3   | T/C     | SETD2              | 47073414  | cis        | 3.27E-310 |
| rs6794193(LD to rs6785790)   | Pleiotropic | 3   | T/C     | SETD2              | 47073414  | cis        | 3.27E-310 |
| rs2206734                    | Pleiotropic | 6   | C/T     | CDKAL1             | 20694653  | trans      | 1.71E-07  |
| rs579459                     | Pleiotropic | 9   | T/C     | ABO                | 133278724 | cis        | 1.45E-09  |
| rs163177                     | Pleiotropic | 11  | T/C     | KCNQ1              | 2799835   | cis        | 1.71E-58  |
| rs231354                     | Pleiotropic | 11  | T/C     | KCNQ1, KCNQ1OT1    | 2685121   | cis        | 1.43E-29  |
| rs231354(LD to rs462402)     | Pleiotropic | 11  | T/C     | KCNQ1, KCNQ1OT1    | 2685121   | cis        | 4.17E-46  |
| rs3213225                    | Pleiotropic | 11  | G/A     | IGF2, INS-IGF2     | 2135306   | cis        | 4.24E-07  |
| rs6565531                    | Pleiotropic | 17  | G/A     | BAIAP2             | 81049580  | cis        | 3.27E-310 |
| rs878619(LD to rs989128)     | Pleiotropic | 17  | A/G     | SPATA20            | 50555910  | cis        | 1.28E-43  |
| rs926345(LD to rs4297946)    | Pleiotropic | 20  | T/C     | PLCG1              | 41143307  | trans      | 1.61E-14  |
| rs137848(LD to rs137864)     | Pleiotropic | 22  | T/C     | IL17REL            | 50001867  | cis        | 5.70E-24  |
| rs137848(LD to rs5771222)    | Pleiotropic | 22  | T/C     | IL17REL            | 50001867  | cis        | 9.01E-147 |
| rs12631028(LD to rs12493718) | DM          | 3   | C/T     | PPARG              | 12299907  | cis        | 7.39E-07  |
| rs6446490                    | DM          | 4   | G/A     | PPP2R2C            | 6322920   | cis        | 2.81E-16  |
| rs6918311(LD to rs947733)    | DM          | 6   | A/G     | RPL35AP3           | 136966564 | cis        | 7.58E-110 |
| rs7787720(LD to rs17167582)  | DM          | 7   | C/T     | AC005019.2         | 13847029  | cis        | 2.04E-22  |
| rs849135                     | DM          | 7   | G/A     | JAZF1              | 28156794  | trans      | 1.22E-07  |
| rs12245680                   | DM          | 10  | T/C     | TCF7L2             | 113060432 | cis        | 8.59E-05  |
| rs7904519(LD to rs7077247)   | DM          | 10  | A/G     | TCF7L2             | 113014168 | cis        | 9.91E-09  |
| rs1002226(LD to rs2074314)   | DM          | 11  | C/T     | AC124798.1         | 17384070  | cis        | 5.01E-05  |
| rs11819995                   | DM          | 11  | C/T     | ETS1               | 128519496 | cis        | 5.19E-05  |
| rs12786533(LD to rs16924912) | DM          | 11  | G/A     | KCNQ1DN            | 2875083   | cis        | 1.48E-28  |
| rs2237892(LD to rs2283228)   | DM          | 11  | C/T     | KCNQ1              | 2818521   | cis        | 1.45E-10  |
| rs2334499                    | DM          | 11  | C/T     | FAM99B             | 1675619   | cis        | 4.05E-09  |
| rs12422899(LD to rs11147248) | DM          | 12  | T/C     | ZNF891, AC026786.2 | 133115743 | cis        | 2.13E-12  |
| rs11073964                   | DM          | 15  | C/T     | VPS33B             | 91000531  | cis        | 5.73E-05  |
| rs2291725(LD to rs3895874)   | DM          | 17  | T/C     | GIP                | 48961770  | cis        | 1.62E-06  |
| rs10807805(LD to rs4719646)  | BW          | 7   | CA/C,CG | AMZ1               | 2714216   | cis        | 6.51E-17  |
| rs2886070                    | BW          | 1   | G/A     | ARHGEF2            | 156004180 | cis        | 2.43E-11  |
| rs6687139                    | BW          | 1   | A/G     | LINC01681          | 170204121 | cis        | 1.90E-05  |
| rs12623454(LD to rs1869026)  | BW          | 2   | G/C     | AC073257.1         | 120568721 | cis        | 5.30E-08  |
| rs2952769(LD to rs2464975)   | BW          | 2   | T/C     | METTL21A           | 207629538 | cis        | 1.55E-154 |
| rs4853831                    | BW          | 2   | T/C     | MYT1L, AC093390.2  | 1809892   | cis        | 1.60E-77  |
| rs6918981                    | BW          | 6   | G/A     | AL354740.1         | 34270737  | trans      | 2.57E-07  |
| rs7766106(LD to rs9491706)   | BW          | 6   | C/T     | RSPO3              | 127133993 | cis        | 1.41E-44  |
| rs2191883(LD to rs4720169)   | BW          | 7   | T/C     | TBX20              | 35233679  | cis        | 5.16E-06  |
| rs855715                     | BW          | 10  | G/T     | ADRB1              | 114063765 | cis        | 2.48E-06  |
| rs4980661(LD to rs12365305)  | BW          | 11  | G/A     | AP000439.2         | 69491811  | cis        | 1.02E-04  |
| rs12306172(LD to rs35786993) | BW          | 12  | G/A     | SMUG1, SMUG1-AS1   | 54145221  | cis        | 7.72E-05  |
| rs2293429(LD to rs2272300)   | BW          | 12  | A/C     | CSAD               | 53180119  | cis        | 7.73E-36  |

|                             |    |    |     |         |           |       |           |
|-----------------------------|----|----|-----|---------|-----------|-------|-----------|
| rs3184504                   | BW | 12 | T/C | SH2B3   | 111446804 | cis   | 6.30E-07  |
| rs3184504(LD to rs10774625) | BW | 12 | T/C | SH2B3   | 111446804 | trans | 4.10E-16  |
| rs3184504(LD to rs653178)   | BW | 12 | T/C | SH2B3   | 111446804 | trans | 9.62E-17  |
| rs8039305                   | BW | 15 | T/C | FURIN   | 90879313  | cis   | 3.63E-29  |
| rs11079803                  | BW | 17 | G/A | PNPO    | 47942535  | cis   | 5.25E-09  |
| rs3760318                   | BW | 17 | G/A | ADAP2   | 30920697  | cis   | 3.46E-05  |
| rs4647887                   | BW | 17 | A/G | SNHG16  | 76562724  | cis   | 6.23E-20  |
| rs12455403                  | BW | 18 | T/C | EPB41L3 | 5620115   | cis   | 2.22E-07  |
| rs2261988                   | BW | 19 | G/T | UHRF1   | 4910877   | cis   | 1.83E-05  |
| rs2261988(LD to rs2602710)  | BW | 19 | G/T | UHRF1   | 4910877   | cis   | 1.85E-17  |
| rs2261988(LD to rs3786942)  | BW | 19 | G/T | UHRF1   | 4910877   | cis   | 6.37E-231 |
| rs2261988(LD to rs4544355)  | BW | 19 | G/T | UHRF1   | 4910877   | cis   | 1.55E-154 |
| rs492602                    | BW | 19 | A/G | FUT2    | 48703160  | trans | 2.50E-07  |
| rs492602(LD to rs281379)    | BW | 19 | A/G | FUT2    | 48703160  | trans | 8.68E-08  |
| rs492602(LD to rs503279)    | BW | 19 | A/G | FUT2    | 48703160  | trans | 6.56E-08  |
| rs492602(LD to rs504963)    | BW | 19 | A/G | FUT2    | 48703160  | cis   | 7.75E-10  |
| rs492602(LD to rs601338)    | BW | 19 | A/G | FUT2    | 48703160  | cis   | 1.61E-222 |
| rs492602(LD to rs602662)    | BW | 19 | A/G | FUT2    | 48703160  | trans | 2.42E-08  |
| rs492602(LD to rs681343)    | BW | 19 | A/G | FUT2    | 48703160  | cis   | 2.64E-257 |
| rs5765275(LD to rs2272804)  | BW | 22 | A/G | SMC1B   | 45352459  | cis   | 3.27E-310 |
| rs5765275(LD to rs5765335)  | BW | 22 | A/G | SMC1B   | 45352459  | cis   | 3.27E-310 |

**Supplementary Table 3. metabolic QTL (mQTL) Effect of Novel CpG-SNPs**

| rsID       | Traits      | Metabolics                       | related disease or biofunctions (PMID)                                        | Sample Type | P        | Source                   | PMID     |
|------------|-------------|----------------------------------|-------------------------------------------------------------------------------|-------------|----------|--------------------------|----------|
| rs677042   | Pleiotropic | ursodeoxycholate                 | Colorectal cancer (23940645)                                                  | serum       | 4.71E-05 | SI data (Shin et al.)    | 24816252 |
| rs6948511  | Pleiotropic | X-11795                          |                                                                               | serum       | 3.30E-06 | SI data (Shin et al.)    | 24816252 |
| rs7723     | Pleiotropic | 1-oleoylglycerophosphocholine    | T2D (2528830)                                                                 | serum       | 2.12E-05 | SI data (Shin et al.)    | 24816252 |
| rs1042725  | Pleiotropic | serine                           | Pancreatic cancer (20300169), Obesity (24740590)                              | serum       | 7.98E-07 | SI data (Shin et al.)    | 24816252 |
| rs1447351  | Pleiotropic | X-13619                          |                                                                               | serum       | 4.98E-05 | SI data (Shin et al.)    | 24816252 |
| rs2488071  | Pleiotropic | 21-hydroxypregnenolone disulfate |                                                                               | serum       | 7.04E-07 | SI data (Long et al.)    | 28263315 |
|            |             | leucine                          | Pancreatic cancer (20300169), Colorectal cancer (27275383)                    | serum       | 8.11E-05 | SI data (Shin et al.)    | 24816252 |
| rs579459   | Pleiotropic | glycylglycine                    | Colorectal cancer (27275383), Alzheimer's disease (28951883)                  | serum       | 8.38E-10 | SI data (Long et al.)    | 28263315 |
|            |             | phenylalanylserine               | Colorectal cancer (27275383)                                                  | serum       | 2.78E-06 | SI data (Long et al.)    | 28263315 |
|            |             | leucylalanine                    | Colorectal cancer (27275383), Pancreatic cancer (20300169), Uremia (22626821) | serum       | 8.62E-11 | SI data (Long et al.)    | 28263315 |
|            |             | X-17178                          |                                                                               | serum       | 1.57E-09 | SI data (Long et al.)    | 28263315 |
|            |             | alpha-glutamylglycine            |                                                                               | serum       | 5.11E-09 | SI data (Long et al.)    | 28263315 |
|            |             | X-14086                          |                                                                               | serum       | 5.15E-05 | SI data (Shin et al.)    | 24816252 |
|            |             | ADpSGEGDFXAEGGGVR*               | T2D (30372032)                                                                | serum       | 2.09E-19 | SI data (Shin et al.)    | 24816252 |
|            |             | phenylalanylserine               | Colorectal cancer (27275383)                                                  | serum       | 3.53E-07 | SI data (Shin et al.)    | 24816252 |
|            |             | leucylalanine                    | Colorectal cancer (27275383), Pancreatic cancer (20300169), Uremia (22626821) | serum       | 1.26E-08 | SI data (Shin et al.)    | 24816252 |
|            |             | alpha-glutamyltyrosine           | Colorectal cancer (27275383)                                                  | serum       | 2.64E-05 | SI data (Shin et al.)    | 24816252 |
|            |             | aspartylphenylalanine            | Colorectal cancer (27275383)                                                  | serum       | 5.21E-07 | SI data (Shin et al.)    | 24816252 |
|            |             | O-sulfo-L-tyrosine               | CKD (26449609)                                                                | serum       | 3.03E-09 | SI data (Shin et al.)    | 24816252 |
| rs7004862  | Pleiotropic | SM C24:0                         |                                                                               | serum       | 5.19E-05 | SI data (Draisma et al.) | 26068415 |
| rs7816345  | Pleiotropic | PC aa C34:4                      | Obesity (26910390)                                                            | serum       | 7.47E-05 | SI data (Draisma et al.) | 26068415 |
|            |             | hyodeoxycholate                  | Primary biliary cirrhosis (2621422)                                           | serum       | 2.87E-05 | SI data (Suhre et al.)   | 21886157 |
| rs7787720  | T2D         | salicyluric glucuronide*         |                                                                               | serum       | 9.33E-05 | SI data (Shin et al.)    | 24816252 |
| rs2383208  | T2D         | lysine                           | Pancreatic cancer (20300169), Colorectal cancer (20156336)                    | serum       | 8.79E-06 | SI data (Shin et al.)    | 24816252 |
| rs10786044 | T2D         | 2-hydroxypalmitate               | CKD (5672969)                                                                 | serum       | 8.89E-05 | SI data (Shin et al.)    | 24816252 |
| rs2237892  | T2D         | gamma-glutamylvaline             | Inflammatory Response (28691814)                                              | serum       | 6.02E-05 | SI data (Suhre et al.)   | 21886157 |
|            |             | N2,N2-dimethylguanosine          | Kidney disease (9607216)                                                      | serum       | 9.42E-05 | SI data (Shin et al.)    | 24816252 |

|            |     |                                  |                                                                               |       |           |                          |          |
|------------|-----|----------------------------------|-------------------------------------------------------------------------------|-------|-----------|--------------------------|----------|
| rs1216373  | T2D | ergothioneine                    |                                                                               | serum | 8.69E-05  | SI data (Shin et al.)    | 24816252 |
| rs10774563 | T2D | butyrylcarnitine                 | Obesity (26910390)                                                            | serum | 5.32E-121 | SI data (Shin et al.)    | 24816252 |
|            |     | ethylmalonate                    | Anorexia nervosa (10197568), Malonyl-Coa decarboxylase deficiency (9177981)   | serum | 1.92E-62  | SI data (Long et al.)    | 28263315 |
|            |     | butyrylcarnitine                 | Obesity (26910390)                                                            | serum | 7.94E-50  | SI data (Long et al.)    | 28263315 |
|            |     | methylsuccinate                  | Colorectal cancer (27275383)                                                  | serum | 8.82E-19  | SI data (Long et al.)    | 28263315 |
|            |     | butyrylcarnitine                 | Obesity (26910390)                                                            | serum | 2.20E-16  | SI data (Suhre et al.)   | 21886157 |
| rs17202418 | T2D | dihomo-linolenate (20:3n3 or n6) | oxidative stress (24760997)                                                   | serum | 4.82E-05  | SI data (Suhre et al.)   | 21886157 |
| rs2066612  | T2D | X-11847                          |                                                                               | serum | 8.27E-05  | SI data (Shin et al.)    | 24816252 |
| rs11659412 | T2D | X-23026                          |                                                                               | serum | 9.85E-06  | SI data (Long et al.)    | 28263315 |
|            |     | methylamine                      | Uremia (22626821), Crohn's disease (17269711)                                 | urine | 3.76E-05  | SI data (Raffler et al.) | 26352407 |
| rs11125079 | BW  | HWESASXX*                        |                                                                               | serum | 7.34E-05  | SI data (Suhre et al.)   | 21886157 |
| rs7701346  | BW  | X-11261                          |                                                                               | serum | 4.81E-05  | SI data (Shin et al.)    | 24816252 |
| rs863818   | BW  | 1-methylxanthine                 | Colorectal cancer (27275383), Asthma (15537072)                               | serum | 2.95E-05  | SI data (Suhre et al.)   | 21886157 |
| rs3750640  | BW  | phenylalanylserine               | Colorectal cancer (27275383)                                                  | serum | 1.85E-05  | SI data (Shin et al.)    | 24816252 |
| rs9416062  | BW  | 2-hydroxyisobutyrate             | Colorectal cancer (27275383)                                                  | urine | 5.38E-05  | SI data (Raffler et al.) | 26352407 |
| rs11051137 | BW  | X-24309                          |                                                                               | serum | 7.93E-06  | SI data (Long et al.)    | 28263315 |
| rs3184504  | BW  | hypoxanthine                     | Colorectal cancer (27275383), Pancreatic cancer (20300169), Uremia (22626821) | serum | 8.94E-07  | SI data (Long et al.)    | 28263315 |
|            |     | C-glycosyltryptophan*            |                                                                               | serum | 1.66E-05  | SI data (Shin et al.)    | 24816252 |
|            |     | gamma-glutamylleucine            | Colorectal cancer (27275383)                                                  | serum | 9.21E-05  | SI data (Shin et al.)    | 24816252 |
|            |     | kynurenine                       | Crohn's disease (27609529), Ulcerative colitis (27609529)                     | serum | 6.05E-18  | SI data (Shin et al.)    | 24816252 |
|            |     | erythronate*                     | Colorectal cancer (27275383)                                                  | serum | 8.62E-06  | SI data (Shin et al.)    | 24816252 |
|            |     | laurate (12:0)                   |                                                                               | serum | 8.19E-05  | SI data (Suhre et al.)   | 21886157 |
| rs7296248  | BW  | glycodeoxycholate                | Colorectal cancer (27275383)                                                  | serum | 7.18E-05  | SI data (Shin et al.)    | 24816252 |
| rs2586211  | BW  | allantoin                        | Crohn's disease (27609529), Colorectal cancer (25037050)                      | serum | 5.80E-05  | SI data (Shin et al.)    | 24816252 |
| rs492602   | BW  | ADpSGEGDFXAEGGGVR*               | T2D (30372032)                                                                | serum | 2.62E-11  | SI data (Shin et al.)    | 24816252 |
|            |     | X-08402                          |                                                                               | serum | 2.03E-05  | SI data (Shin et al.)    | 24816252 |
|            |     | citrulline                       | Crohn's disease (27609529), Gout (28270806)                                   | serum | 7.45E-05  | SI data (Shin et al.)    | 24816252 |
| rs533318   |     | tiglyl carnitine                 |                                                                               | serum | 4.81E-05  | SI data (Suhre et al.)   | 21886157 |

**Supplementary Table 4. metabolic pathway analysis ( $P < 0.05$ )**

| Traits | Pathway                         | Total | Hits | Impact  | P-value  | Details |
|--------|---------------------------------|-------|------|---------|----------|---------|
| T2D    | Aminoacyl-tRNA biosynthesis     | 75    | 4    | 0.11268 | 9.15E-04 | KEGG    |
|        | alpha-Linolenic acid metabolism | 29    | 2    | 0.20335 | 1.34E-02 | KEGG    |
|        | Methane metabolism              | 34    | 2    | 0.01778 | 1.81E-02 | KEGG    |
|        | Glycerophospholipid metabolism  | 39    | 2    | 0.1037  | 2.35E-02 | KEGG    |
| BW     | Aminoacyl-tRNA biosynthesis     | 75    | 3    | 0.05634 | 8.26E-03 | KEGG    |
|        | Glycerophospholipid metabolism  | 39    | 2    | 0.1037  | 2.06E-02 | KEGG    |

**Supplementary Table 5. Conditional FDR value of 188 CpG-SNPs for BW given the T2DM (cFDR < 0.05)**

| Variant    | Chr | Pos       | Alt | Gene                      | Annotation                                  | Snps Type | Gene Type | eQTL/meQTL/<br>metaQTL | P        | cFDR     |
|------------|-----|-----------|-----|---------------------------|---------------------------------------------|-----------|-----------|------------------------|----------|----------|
| rs10449766 | 1   | 42070125  | A/G | HNRNPF1                   | 28396 upstream                              | novel     | novel     |                        | 2.00E-03 | 3.73E-02 |
| rs11264298 | 1   | 155036782 | G/A | DCST1                     | intronic                                    | novel     | novel     | eQTL                   | 6.80E-05 | 3.07E-02 |
| rs11537641 | 1   | 42930743  | G/A | SLC2A1                    | coding syn                                  | novel     | novel     |                        | 4.90E-05 | 4.43E-02 |
| rs11589239 | 1   | 227849577 | C/T | PRSS38                    | 3107 upstream                               | novel     | novel     | eQTL                   | 5.80E-04 | 3.77E-02 |
| rs1415181  | 1   | 214857808 | T/C | GAPDHP24                  | 12926 downstream                            | novel     | novel     |                        | 3.70E-06 | 5.20E-03 |
| rs2744718  | 1   | 22197234  | T/C | WNT4                      | 53265 upstream                              | novel     | novel     | eQTL                   | 3.50E-06 | 4.00E-03 |
| rs2886070  | 1   | 156004180 | G/A | ARHGEF2                   | intronic                                    | novel     | novel     | eQTL/meQTL             | 3.50E-08 | 3.39E-05 |
| rs340883   | 1   | 213972363 | C/T | PROX1-AS1                 | non-coding intronic                         | novel     | novel     |                        | 7.10E-03 | 2.13E-02 |
| rs6687139  | 1   | 170204121 | A/G | LINC01681                 | non-coding intronic                         | novel     | novel     | eQTL/meQTL             | 3.80E-05 | 3.54E-02 |
| rs7527321  | 1   | 232632149 | T/C | RNU6-1211P                | 68055 downstream                            | novel     | novel     |                        | 1.30E-05 | 1.64E-02 |
| rs7542242  | 1   | 22151000  | C/T | WNT4                      | 7031 upstream                               | novel     | novel     | eQTL                   | 3.80E-05 | 3.62E-02 |
| rs7553890  | 1   | 213832562 | T/C | PROX1-AS1                 | non-coding                                  | novel     | novel     |                        | 6.70E-05 | 2.53E-03 |
| rs10165908 | 2   | 157459117 | T/C | CYTIP                     | intronic                                    | novel     | novel     |                        | 5.40E-05 | 3.17E-02 |
| rs11125079 | 2   | 46505076  | C/T | ATP6V1E2                  | non-coding intronic                         | novel     | novel     | eQTL/metaQTL           | 9.50E-06 | 1.04E-02 |
| rs12476224 | 2   | 56154789  | A/G | AC011306.1,<br>AC007744.1 | non-coding intronic,<br>non-coding intronic | novel     | novel     |                        | 2.40E-04 | 3.82E-02 |
| rs12623454 | 2   | 120568721 | G/C | AC073257.1                | 10612 upstream                              | novel     | novel     | meQTL                  | 2.40E-05 | 1.66E-02 |
| rs1515114  | 2   | 226233671 | A/G | AC062015.1                | 48300 upstream                              | novel     | novel     | eQTL                   | 2.60E-03 | 1.82E-02 |
| rs1522812  | 2   | 226132738 | A/G | AC062015.1                | 47306 downstream                            | novel     | novel     | eQTL                   | 4.30E-03 | 1.55E-02 |
| rs17745230 | 2   | 46263191  | C/T | Metazoa_SRP               | 3499 downstream                             | novel     | novel     | eQTL                   | 9.10E-07 | 1.01E-03 |
| rs1901263  | 2   | 46591447  | C/T | PIGF                      | intronic                                    | novel     | novel     | eQTL                   | 3.50E-05 | 1.21E-02 |
| rs2894593  | 2   | 226325601 | T/C | AC062015.1                | 140230 upstream                             | novel     | novel     | eQTL                   | 3.80E-04 | 6.05E-03 |
| rs2952769  | 2   | 207629538 | T/C | METTL21A                  | 3610 upstream                               | novel     | novel     | eQTL/meQTL             | 8.50E-06 | 8.79E-03 |
| rs34367192 | 2   | 9502349   | C/T | ADAM17                    | intronic                                    | novel     | novel     | eQTL                   | 2.50E-04 | 1.29E-02 |
| rs4669521  | 2   | 10051809  | G/A | KLF11                     | intronic                                    | novel     | novel     | eQTL                   | 6.20E-05 | 4.91E-02 |
| rs4853831  | 2   | 1809892   | T/C | MYT1L,<br>AC093390.2      | intronic, non-coding                        | novel     | novel     | eQTL/meQTL             | 5.10E-05 | 2.71E-02 |
| rs6735418  | 2   | 43002048  | A/G | AC016735.1                | non-coding intronic                         | novel     | novel     | eQTL                   | 1.00E-05 | 1.34E-02 |
| rs7561273  | 2   | 24024644  | A/G | MFSD2B                    | intronic                                    | novel     | novel     | eQTL                   | 2.10E-07 | 2.56E-04 |
| rs7605661  | 2   | 43397939  | T/C | THADA                     | intronic                                    | novel     | novel     | meQTL                  | 3.90E-04 | 1.87E-03 |
| rs935172   | 2   | 26581379  | T/C | CIB4                      | coding nonsyn                               | novel     | novel     |                        | 9.30E-05 | 3.71E-02 |
| rs17290714 | 3   | 47854215  | C/T | MAP4                      | intronic                                    | novel     | novel     | eQTL                   | 1.80E-05 | 1.87E-02 |
| rs17361324 | 3   | 123412407 | C/T | ADCY5                     | intronic                                    | novel     | novel     | meQTL                  | 8.00E-20 | 1.20E-18 |
| rs2306531  | 3   | 157099873 | C/T | LINC00880,<br>LINC00881   | non-coding intronic,<br>3downstream         | novel     | novel     | eQTL                   | 8.60E-06 | 1.34E-02 |
| rs4677887  | 3   | 123381376 | T/G | ADCY5                     | intronic                                    | confirmed | confirmed | eQTL                   | 2.30E-12 | 2.91E-11 |



|            |   |           |     |                         |                                             |           |           |              |          |          |
|------------|---|-----------|-----|-------------------------|---------------------------------------------|-----------|-----------|--------------|----------|----------|
| rs4677889  | 3 | 123424425 | G/A | ADCY5                   | intronic                                    | novel     | novel     |              | 4.50E-04 | 1.02E-02 |
| rs4681161  | 3 | 148891258 | T/C | AC092979.1,<br>CPA3     | non-coding intronic,<br>intronic            | novel     | novel     | eQTL         | 4.40E-09 | 3.45E-06 |
| rs569255   | 3 | 125207090 | G/A | SLC12A8                 | intronic                                    | novel     | novel     | eQTL         | 4.50E-04 | 1.01E-02 |
| rs6770420  | 3 | 170931960 | G/A | KLF7P1                  | 20890 downstream                            | novel     | novel     | eQTL/metaQTL | 4.60E-03 | 1.63E-02 |
| rs6794193  | 3 | 47073414  | T/C | SETD2                   | intronic                                    | novel     | novel     | eQTL/meQTL   | 4.20E-05 | 3.02E-03 |
| rs870429   | 3 | 123159172 | A/G | PDIA5                   | intronic                                    | novel     | novel     | eQTL         | 1.20E-04 | 2.42E-02 |
| rs900399   | 3 | 157080943 | A/G | LINC00880               | 724 downstream                              | novel     | novel     | eQTL         | 2.90E-41 | 4.05E-37 |
| rs9289218  | 3 | 123345984 | C/T | ADCY5                   | intronic                                    | novel     | novel     | eQTL         | 1.80E-05 | 8.91E-04 |
| rs10020719 | 4 | 129331259 | A/G | AC082650.1              | 26237 upstream                              | novel     | novel     |              | 5.00E-05 | 2.21E-02 |
| rs1129998  | 4 | 150798111 | A/G | LRBA                    | coding syn                                  | novel     | novel     |              | 1.00E-05 | 9.19E-03 |
| rs12502033 | 4 | 144701499 | T/C | HHIP, GYP A             | intron, intron                              | novel     | novel     |              | 1.10E-07 | 1.39E-04 |
| rs17447835 | 4 | 42592928  | A/G | ATP8A1                  | intronic                                    | novel     | novel     | eQTL         | 8.00E-05 | 4.72E-02 |
| rs2301718  | 4 | 105088606 | G/A | AC096577.1              | non-coding intronic                         | novel     | novel     |              | 6.60E-05 | 4.59E-02 |
| rs7663887  | 4 | 17901297  | C/A | LCORL                   | intronic                                    | novel     | novel     | eQTL         | 2.70E-09 | 5.90E-07 |
| rs7682893  | 4 | 130355629 | G/A | LINC02479               | 20600 downstream                            | novel     | novel     |              | 2.60E-05 | 2.68E-02 |
| rs10514870 | 5 | 59055501  | A/G | PDE4D,<br>AC092343.1    | intron, non-coding<br>intronic              | novel     | novel     |              | 5.00E-06 | 4.17E-04 |
| rs110873   | 5 | 57632548  | A/G | AC008780.2              | 15117 upstream                              | novel     | novel     | eQTL         | 3.60E-05 | 3.52E-02 |
| rs12653511 | 5 | 77014955  | A/G | AGGF1                   | 14296 downstream                            | novel     | novel     |              | 3.00E-05 | 2.94E-02 |
| rs13153101 | 5 | 68289314  | A/C | PIK3R1                  | intronic                                    | novel     | novel     |              | 5.00E-06 | 7.86E-03 |
| rs1705392  | 5 | 67204440  | C/G | CD180                   | 7641 upstream                               | novel     | novel     |              | 6.90E-04 | 3.55E-02 |
| rs4130707  | 5 | 85071655  | G/T | AC114928.1              | 40687 downstream                            | novel     | novel     |              | 9.50E-05 | 4.75E-02 |
| rs4699908  | 5 | 57618434  | G/A | AC008780.2              | 1003 upstream                               | novel     | novel     |              | 4.50E-06 | 3.46E-03 |
| rs6556350  | 5 | 158452481 | C/T | AC091979.1              | non-coding                                  | novel     | novel     |              | 2.30E-06 | 2.55E-03 |
| rs7701346  | 5 | 134492665 | A/G | AC005355.1              | 146 upstream                                | novel     | novel     | eQTL/metaQTL | 4.20E-04 | 2.43E-02 |
| rs7717779  | 5 | 8429660   | C/T | LINC02226,<br>C091965.1 | non-coding intronic,<br>non-coding intronic | novel     | novel     |              | 3.40E-05 | 4.17E-03 |
| rs845734   | 5 | 109687709 | C/A | AC012603.1              | 93 downstream                               | novel     | novel     | eQTL         | 2.00E-05 | 1.36E-02 |
| rs863818   | 5 | 68258195  | A/G | PIK3R1                  | intronic                                    | novel     | novel     | metaQTL      | 1.10E-05 | 1.22E-02 |
| rs10080410 | 6 | 132289467 | G/A | MOXD1                   | 6588 downstream                             | novel     | novel     |              | 8.60E-04 | 2.81E-02 |
| rs1012635  | 6 | 20675064  | A/G | CDKAL1                  | intronic                                    | confirmed | confirmed |              | 4.00E-10 | 1.00E-09 |
| rs1040525  | 6 | 142382532 | C/T | ADGRG6                  | intronic                                    | novel     | novel     | eQTL         | 6.10E-05 | 4.91E-02 |
| rs10946101 | 6 | 165751179 | C/G | PDE10A                  | non-coding intronic                         | novel     | novel     |              | 7.20E-04 | 2.46E-02 |
| rs10947463 | 6 | 33879300  | G/A | LINC01016               | non-coding intronic                         | novel     | novel     | eQTL         | 2.20E-05 | 2.04E-02 |
| rs10947659 | 6 | 37141909  | C/A | PIM1                    | 28294 downstream                            | novel     | novel     |              | 1.80E-05 | 2.05E-02 |
| rs12526403 | 6 | 41676676  | C/T | TFEB                    | 7302 downstream                             | novel     | novel     |              | 2.10E-03 | 3.83E-02 |
| rs1361024  | 6 | 151749793 | G/A | ESR1                    | intronic                                    | novel     | novel     |              | 8.00E-06 | 1.25E-02 |
| rs1415701  | 6 | 130024690 | G/A | L3MBTL3                 | intronic                                    | confirmed | novel     | eQTL         | 4.00E-11 | 3.30E-07 |
| rs1547669  | 6 | 33807864  | A/G | MLN                     | 3853 upstream                               | novel     | novel     | eQTL         | 1.00E-05 | 5.28E-03 |
| rs2206734  | 6 | 20694653  | C/T | CDKAL1                  | intronic                                    | novel     | novel     | meQTL        | 2.40E-17 | 4.80E-17 |
| rs2273669  | 6 | 108963986 | A/G | ARMC2                   | intronic                                    | novel     | novel     | eQTL         | 7.60E-06 | 1.07E-02 |
| rs2745929  | 6 | 20754530  | T/C | CDKAL1                  | intronic                                    | novel     | novel     |              | 1.10E-09 | 4.77E-09 |
| rs2982570  | 6 | 151692613 | C/T | ESR1                    | intronic                                    | novel     | novel     |              | 4.30E-07 | 3.38E-04 |
| rs4897378  | 6 | 130217352 | C/T | SAMD3                   | 5upstream                                   | novel     | novel     | eQTL         | 2.80E-04 | 1.20E-02 |
| rs6918981  | 6 | 34270737  | G/A | AL354740.1              | non-coding intronic                         | novel     | novel     | eQTL/meQTL   | 1.10E-05 | 5.44E-03 |
| rs6933511  | 6 | 130135793 | A/C | L3MBTL3,<br>KLF7P1      | intronic, non-coding<br>intronic            | novel     | novel     | eQTL         | 2.60E-06 | 1.71E-03 |
| rs7766106  | 6 | 127133993 | C/T | RSPO3                   | intronic                                    | novel     | novel     | eQTL/meQTL   | 2.60E-05 | 1.48E-02 |
| rs9385532  | 6 | 130050082 | T/C | L3MBTL3                 | intronic                                    | novel     | novel     | eQTL         | 2.00E-04 | 4.18E-02 |

|            |    |           |         |                    |                      |           |           |                        |          |          |
|------------|----|-----------|---------|--------------------|----------------------|-----------|-----------|------------------------|----------|----------|
| rs9492469  | 6  | 130169033 | G/A     | SAMD3              | intronic             | novel     | novel     | eQTL                   | 1.80E-05 | 2.01E-02 |
| rs10807805 | 7  | 2714216   | CA/C,CG | AMZ1               | 3utr                 | novel     | novel     | eQTL/meQTL             | 1.40E-07 | 4.61E-04 |
| rs12704091 | 7  | 149267936 | A/G     | ZNF783             | intronic             | novel     | novel     | eQTL                   | 9.70E-07 | 1.10E-03 |
| rs17401675 | 7  | 73643220  | A/G     | MLXIPL             | 18677 upstream       | novel     | confirmed | eQTL                   | 1.50E-11 | 2.12E-08 |
| rs17689040 | 7  | 40880714  | C/G     | SUGCT              | 19951 upstream       | novel     | novel     |                        | 6.20E-04 | 1.31E-02 |
| rs2191883  | 7  | 35233679  | T/C     | TBX20              | intronic             | novel     | novel     | meQTL                  | 4.20E-06 | 7.90E-03 |
| rs2389995  | 7  | 18933395  | A/G     | HDAC9              | intronic             | novel     | novel     |                        | 6.30E-05 | 3.34E-02 |
| rs4143341  | 7  | 159262263 | A/G     | PIP5K1P2           | 28886 upstream       | novel     | novel     | eQTL                   | 3.20E-06 | 6.93E-03 |
| rs6947302  | 7  | 149172403 | T/C     | ZNF398             | intronic             | novel     | novel     |                        | 5.40E-04 | 4.31E-02 |
| rs6948511  | 7  | 27939096  | T/C     | JAZF1              | intronic             | novel     | novel     | metaQTL                | 9.50E-05 | 5.80E-03 |
| rs7723     | 7  | 44578194  | G/A     | TMED4              | 3utr                 | novel     | novel     | eQTL/metaQTL           | 1.40E-04 | 8.40E-04 |
| rs12677785 | 8  | 141243157 | A/G     | SLC45A4            | intronic             | novel     | novel     | eQTL                   | 2.70E-05 | 1.20E-02 |
| rs17217757 | 8  | 105601093 | G/C     | ZFPM2              | intronic             | novel     | novel     |                        | 5.90E-05 | 3.12E-02 |
| rs6989280  | 8  | 125496504 | G/A     | AC091114.1         | non-coding intronic  | confirmed | novel     |                        | 5.00E-08 | 1.10E-04 |
| rs7004862  | 8  | 94864735  | T/G     | INTS8              | intronic             | novel     | novel     | eQTL/metaQTL           | 1.70E-03 | 9.35E-03 |
| rs7816345  | 8  | 36988591  | C/T     | AC090453.1         | 179 upstream         | novel     | novel     | eQTL/metaQTL           | 4.20E-04 | 1.05E-02 |
| rs10739970 | 9  | 94134010  | A/G     | PTPDC1             | 24154 upstream       | novel     | novel     |                        | 3.00E-03 | 3.78E-02 |
| rs10816736 | 9  | 108835654 | C/T     | AL359692.1         | 679 downstream       | novel     | novel     | eQTL                   | 1.40E-04 | 3.67E-02 |
| rs10990568 | 9  | 95651855  | A/G     | AL354861.2         | non-coding intronic  | novel     | novel     |                        | 5.30E-04 | 1.19E-02 |
| rs2000244  | 9  | 123211138 | A/G     | STRBP              | intronic             | novel     | novel     | eQTL                   | 1.80E-10 | 2.33E-07 |
| rs2236407  | 9  | 95475514  | A/G     | PTCH1              | intronic             | novel     | novel     | eQTL                   | 1.70E-08 | 2.48E-05 |
| rs473902   | 9  | 95493953  | T/G     | PTCH1              | intronic             | novel     | novel     |                        | 6.70E-07 | 1.49E-03 |
| rs534643   | 9  | 111276424 | C/T     | AL162414.1         | non-coding intronic  | novel     | novel     |                        | 1.20E-04 | 4.35E-02 |
| rs579459   | 9  | 133278724 | T/C     | ABO                | 3510 upstream        | novel     | novel     | eQTL/meQTL/<br>metaQTL | 8.30E-06 | 3.60E-05 |
| rs9721852  | 9  | 89748077  | T/C     | UNQ6494            | 28318 upstream       | novel     | novel     |                        | 1.10E-05 | 1.39E-02 |
| rs11250238 | 10 | 1043676   | T/C     | IDI2-AS1/IDI1      | intron,intron        | novel     | novel     | eQTL                   | 4.00E-06 | 1.80E-03 |
| rs1638410  | 10 | 116766015 | T/C     | HSPA12A            | intronic             | novel     | novel     |                        | 5.70E-05 | 3.56E-02 |
| rs17566087 | 10 | 69219200  | A/G     | AL596223.1         | non-coding intronic  | novel     | novel     | eQTL                   | 2.30E-05 | 2.50E-02 |
| rs2421019  | 10 | 122391070 | C/T     | PLEKHA1            | 5upstream,intronic   | novel     | novel     | eQTL                   | 2.70E-04 | 9.45E-04 |
| rs2488071  | 10 | 92739820  | A/G     | Y_RNA              | 29212 upstream       | novel     | novel     | eQTL/metaQTL           | 2.70E-08 | 9.00E-08 |
| rs3750640  | 10 | 5654519   | G/A     | ASB13              | intronic             | novel     | novel     | eQTL/metaQTL           | 3.00E-04 | 3.08E-02 |
| rs7070786  | 10 | 92363930  | C/T     | 5-Mar              | 9966 upstream        | novel     | novel     | eQTL                   | 1.50E-03 | 4.80E-03 |
| rs7088711  | 10 | 102799509 | G/A     | WBP1L              | intronic             | novel     | novel     | eQTL                   | 4.50E-05 | 5.71E-03 |
| rs855715   | 10 | 114063765 | G/T     | ADRB1              | 16857 upstream       | novel     | novel     | meQTL                  | 1.50E-07 | 1.65E-04 |
| rs9416062  | 10 | 75490730  | A/G     | LRMDA              | intronic             | novel     | novel     | eQTL/metaQTL           | 3.40E-04 | 3.70E-02 |
| rs10840346 | 11 | 10041452  | G/A     | SBF2               | intronic             | novel     | novel     | eQTL                   | 7.00E-07 | 7.60E-04 |
| rs1447351  | 11 | 92984997  | A/G     | MTNR1B             | 3utr                 | novel     | novel     | metaQTL                | 2.30E-04 | 2.05E-03 |
| rs151216   | 11 | 2659585   | C/T     | KCNQ1,<br>KCNQ1OT1 | intronic, non-coding | novel     | novel     |                        | 5.10E-05 | 1.97E-04 |
| rs163177   | 11 | 2817183   | T/C     | KCNQ1              | intronic             | novel     | novel     | eQTL/meQTL             | 5.70E-04 | 1.52E-03 |
| rs1944055  | 11 | 58575156  | A/G     | LPXN               | intronic             | novel     | novel     |                        | 3.80E-04 | 3.97E-02 |
| rs231354   | 11 | 2685121   | T/C     | KCNQ1,<br>KCNQ1OT1 | intron, non-coding   | confirmed | confirmed | eQTL/meQTL             | 2.80E-03 | 9.10E-03 |
| rs234857   | 11 | 2831299   | T/C     | KCNQ1              | intronic             | novel     | novel     |                        | 2.00E-02 | 4.67E-02 |
| rs3213225  | 11 | 2135306   | G/A     | IGF2, INS-IGF2     | intronic, intronic   | novel     | novel     | eQTL/meQTL             | 2.70E-06 | 9.59E-05 |
| rs4980661  | 11 | 69491811  | G/A     | AP000439.2         | 11871 upstream       | novel     | novel     | meQTL                  | 1.00E-04 | 1.98E-02 |
| rs546240   | 11 | 30512075  | C/T     | MPPED2             | intronic             | novel     | novel     | eQTL                   | 4.40E-05 | 3.71E-02 |
| rs6590039  | 11 | 124071072 | G/T     | OR10D5P            | 15365 upstream       | novel     | novel     |                        | 2.20E-05 | 2.40E-02 |

|            |    |           |       |                      |                                  |           |           |                        |          |          |
|------------|----|-----------|-------|----------------------|----------------------------------|-----------|-----------|------------------------|----------|----------|
| rs936370   | 11 | 81264293  | C/T   | MTND4LP18            | 287933 downstream                | novel     | novel     |                        | 3.10E-04 | 4.26E-02 |
| rs1042725  | 12 | 65964567  | C/T   | HMGA2                | 3utr                             | confirmed | confirmed | metaQTL                | 7.10E-32 | 1.90E-29 |
| rs10774202 | 12 | 4168281   | A/G   | AC007207.1           | 50149 upstream                   | novel     | novel     |                        | 1.60E-03 | 2.32E-02 |
| rs10862960 | 12 | 77030355  | C/T   | E2F7                 | intronic                         | novel     | novel     | eQTL                   | 2.50E-04 | 7.30E-03 |
| rs10878353 | 12 | 65988752  | T/C   | HMGA2                | 22457 upstream                   | novel     | novel     |                        | 1.40E-08 | 1.04E-06 |
| rs10878359 | 12 | 66010844  | T/C   | MIR6074              | 12776 downstream                 | novel     | novel     |                        | 4.90E-10 | 1.36E-06 |
| rs11051137 | 12 | 30884947  | G/A   | AC010198.2           | 22768 upstream                   | novel     | novel     | metaQTL                | 6.80E-05 | 4.50E-02 |
| rs11067591 | 12 | 115429745 | T/C   | AC078880.2           | 65000 upstream                   | novel     | novel     | eQTL                   | 5.80E-04 | 1.84E-02 |
| rs12306172 | 12 | 54145221  | G/A   | SMUG1,<br>SMUG1-AS1  | intronic, non-coding<br>intronic | novel     | novel     | eQTL/meQTL             | 3.80E-06 | 4.75E-03 |
| rs12828089 | 12 | 46210774  | C/A,T | SLC38A1              | intronic                         | novel     | novel     | eQTL                   | 3.70E-05 | 3.48E-02 |
| rs1870566  | 12 | 65818237  | T/C   | RPSAP52              | intronic                         | novel     | novel     |                        | 7.50E-06 | 4.29E-03 |
| rs2293429  | 12 | 53180119  | A/C   | CSAD                 | intronic                         | novel     | novel     | eQTL/meQTL             | 5.00E-05 | 3.16E-02 |
| rs3184504  | 12 | 111446804 | T/C   | SH2B3                | coding nonsyn                    | novel     | novel     | eQTL/meQTL/meta<br>QTL | 3.70E-06 | 1.75E-03 |
| rs4930718  | 12 | 123428886 | A/G   | RILPL2               | intronic                         | novel     | novel     | eQTL                   | 1.10E-05 | 3.28E-04 |
| rs703545   | 12 | 102549222 | A/G   | AC010202.1           | 35567 upstream                   | novel     | novel     |                        | 8.70E-06 | 5.74E-03 |
| rs7296248  | 12 | 102683420 | C/T   | LINC00485            | 125860 downstream                | novel     | novel     | metaQTL                | 3.20E-04 | 4.49E-02 |
| rs7961772  | 12 | 26798318  | C/T   | ITPR2                | intronic                         | novel     | confirmed | eQTL                   | 3.80E-07 | 7.43E-04 |
| rs7965495  | 12 | 66037910  | G/A   | RPL21P18             | 196 upstream                     | novel     | novel     |                        | 1.10E-04 | 2.97E-02 |
| rs12865243 | 13 | 40104683  | G/A   | LINC00598            | non-coding intronic              | novel     | novel     |                        | 3.00E-06 | 3.32E-04 |
| rs452674   | 13 | 40080917  | T/C   | LINC00598            | non-coding                       | novel     | novel     |                        | 8.50E-05 | 1.70E-02 |
| rs7331478  | 13 | 27919720  | T/G   | PDX1                 | 300 downstream                   | novel     | novel     |                        | 6.50E-05 | 4.79E-02 |
| rs9532498  | 13 | 40104306  | G/C   | LINC00598            | non-coding intronic              | novel     | novel     |                        | 5.20E-05 | 2.22E-03 |
| rs4965425  | 15 | 98638434  | C/T   | AC118658.1           | 8517 downstream                  | novel     | novel     |                        | 6.40E-07 | 5.30E-04 |
| rs8039305  | 15 | 90879313  | T/C   | FURIN                | intronic                         | novel     | novel     | eQTL/meQTL             | 4.90E-08 | 4.55E-05 |
| rs13331339 | 16 | 20179928  | C/T   | AC092132.2           | 21537 upstream                   | novel     | novel     |                        | 1.50E-04 | 3.79E-02 |
| rs2397775  | 16 | 55718812  | A/G   | CES1P2               | 9303 downstream                  | novel     | novel     |                        | 2.40E-05 | 2.54E-02 |
| rs2521477  | 16 | 20016691  | T/C   | GPR139               | 14794 downstream                 | novel     | confirmed | eQTL                   | 4.70E-07 | 1.33E-03 |
| rs4625714  | 16 | 55607701  | C/T   | LPCAT2               | 21031 upstream                   | novel     | novel     |                        | 3.70E-04 | 1.05E-02 |
| rs908382   | 16 | 27204059  | A/C   | KDM8                 | intronic                         | novel     | novel     |                        | 5.20E-05 | 2.91E-02 |
| rs9938631  | 16 | 67397901  | C/T   | ZDHHC1               | intronic                         | novel     | novel     | eQTL                   | 2.50E-05 | 1.67E-02 |
| rs11079803 | 17 | 47942535  | G/A   | PNPO                 | intronic                         | novel     | novel     | eQTL/meQTL             | 9.70E-06 | 5.09E-03 |
| rs1215     | 17 | 7260031   | A/G   | AC003688.1,<br>CLDN7 | intronic,3utr                    | novel     | novel     | eQTL                   | 1.20E-04 | 4.53E-02 |
| rs12939237 | 17 | 49067202  | G/A   | IGF2BP1              | 11552 upstream                   | novel     | novel     | eQTL                   | 1.80E-04 | 1.45E-02 |
| rs1531798  | 17 | 78826049  | A/G   | USP36                | intronic                         | novel     | novel     | eQTL                   | 8.90E-03 | 3.72E-02 |
| rs198542   | 17 | 50567176  | G/A   | CACNA1G              | intronic                         | novel     | novel     |                        | 4.50E-04 | 6.42E-03 |
| rs34870220 | 17 | 7181592   | C/T   | ASGR1                | 2028 upstream                    | novel     | novel     | eQTL                   | 9.90E-07 | 7.32E-04 |
| rs3760318  | 17 | 30920697  | G/A   | ADAP2                | 5upstream                        | novel     | novel     | eQTL/meQTL             | 7.90E-05 | 1.26E-02 |
| rs390200   | 17 | 7206676   | A/G   | DLG4                 | intronic                         | novel     | novel     | eQTL                   | 1.20E-12 | 6.89E-10 |
| rs4647887  | 17 | 76562724  | A/G   | SNHG16               | non-coding intronic              | novel     | novel     | eQTL/meQTL             | 2.80E-04 | 4.93E-02 |
| rs4793636  | 17 | 50062136  | G/A   | ITGA3                | intronic                         | novel     | novel     | eQTL                   | 4.10E-05 | 3.82E-02 |
| rs6565531  | 17 | 81049580  | G/A   | BAIAP2               | intronic                         | novel     | novel     | eQTL/meQTL             | 3.50E-03 | 3.61E-02 |
| rs878619   | 17 | 50555910  | A/G   | SPATA20              | 58 upstream                      | novel     | novel     | eQTL/meQTL             | 2.80E-05 | 4.24E-04 |
| rs12455403 | 18 | 5620115   | T/C   | EPB41L3              | intronic                         | novel     | novel     | meQTL                  | 3.80E-05 | 2.32E-02 |
| rs2586211  | 18 | 11872826  | G/A   | GNAL                 | intronic                         | novel     | novel     | metaQTL                | 4.00E-05 | 1.38E-02 |
| rs4798774  | 18 | 932568    | G/A   | LINC01904            | 4575 upstream                    | novel     | novel     |                        | 2.80E-04 | 4.94E-02 |
| rs10113    | 19 | 46609391  | T/C   | CALM3,<br>AC093503.2 | utr-3, non-coding<br>intronic    | novel     | novel     |                        | 1.20E-03 | 3.79E-02 |

|            |    |          |     |                     |                     |           |           |                    |          |          |
|------------|----|----------|-----|---------------------|---------------------|-----------|-----------|--------------------|----------|----------|
| rs2261988  | 19 | 4910877  | G/T | UHRF1               | 5utr                | novel     | novel     | eQTL/meQTL         | 7.10E-06 | 3.39E-03 |
| rs34033973 | 19 | 40437876 | A/G | SERTAD3             | 2968 downstream     | novel     | novel     | eQTL               | 5.90E-05 | 4.70E-02 |
| rs492602   | 19 | 48703160 | A/G | FUT2                | coding syn          | novel     | novel     | eQTL/meQTL/metaQTL | 4.10E-07 | 5.10E-04 |
| rs533318   | 19 | 40161784 | T/C | MAP3K10             | 29960 downstream    | novel     | novel     | eQTL/meQTL         | 1.80E-04 | 4.94E-02 |
| rs8182579  | 19 | 33418945 | C/T | PEPD                | intronic            | novel     | confirmed | eQTL               | 1.80E-05 | 1.12E-02 |
| rs17536052 | 20 | 10664057 | G/A | JAG1                | intronic            | novel     | novel     |                    | 7.80E-07 | 1.27E-03 |
| rs1886843  | 20 | 58669145 | A/G | STX16, STX16-NPEPL1 | intronic, intronic  | novel     | novel     | eQTL               | 2.00E-04 | 2.74E-02 |
| rs2426778  | 20 | 58718421 | G/A | NPEPL1              | non-coding          | novel     | novel     | eQTL               | 9.70E-05 | 6.10E-03 |
| rs6016377  | 20 | 40544088 | C/T | MAFB                | 141760 downstream   | confirmed | confirmed |                    | 3.60E-10 | 2.24E-06 |
| rs6057610  | 20 | 32653587 | T/C | C20orf203           | 5upstream           | novel     | novel     | eQTL               | 3.00E-10 | 1.99E-06 |
| rs6075924  | 20 | 22531891 | T/C | LINC00261           | 15780 downstream    | novel     | novel     |                    | 4.80E-06 | 5.87E-03 |
| rs6077888  | 20 | 10712341 | C/T | AL050403.2          | non-coding intronic | novel     | novel     |                    | 8.00E-08 | 6.47E-05 |
| rs8125378  | 20 | 31852354 | G/A | DUSP15              | intronic            | novel     | novel     | eQTL               | 4.10E-05 | 3.57E-02 |
| rs926345   | 20 | 41143307 | T/C | PLCG1               | intronic            | novel     | novel     | eQTL/meQTL         | 1.10E-05 | 9.32E-04 |
| rs137848   | 22 | 50001867 | T/C | IL17REL             | intronic            | novel     | novel     | eQTL/meQTL         | 7.50E-03 | 2.08E-02 |
| rs5765275  | 22 | 45352459 | A/G | SMC1B               | coding syn          | novel     | novel     | eQTL/meQTL         | 9.20E-06 | 1.16E-02 |
| rs6006393  | 22 | 30194037 | T/C | AC002378.1          | non-coding intronic | novel     | novel     | eQTL               | 5.10E-03 | 1.53E-02 |

**Supplementary Table 6. Significant results in LocusCompare analysis**

| GeneID             | Gene Symbol   | Chr   | TSS       | GWAS -log10(P) | eQTL -log10(P) | Traits |
|--------------------|---------------|-------|-----------|----------------|----------------|--------|
| ENSG00000169047.5  | IRS1          | chr2  | 227596032 | 8.921          | 10.756         | T2D    |
| ENSG00000272622.1  | RP11-395N3.2  | chr2  | 227664861 | 8.921          | 8.641          | T2D    |
| ENSG00000153814.7  | JAZF1         | chr7  | 27870191  | 13.523         | 8.065          | T2D    |
| ENSG00000149084.7  | HSD17B12      | chr11 | 43577985  | 8.276          | 87.748         | T2D    |
| ENSG00000246250.2  | RP11-613D13.5 | chr11 | 43851258  | 8.276          | 11.800         | T2D    |
| ENSG00000107679.10 | PLEKHA1       | chr10 | 124134211 | 11.745         | 7.278          | T2D    |
| ENSG00000260196.1  | RP1-239B22.5  | chr11 | 17402195  | 7.367          | 10.564         | T2D    |
| ENSG00000188211.4  | NCR3LG1       | chr11 | 17373272  | 7.367          | 9.621          | T2D    |
| ENSG00000157895.7  | C12orf43      | chr12 | 121440315 | 7.444          | 26.424         | T2D    |
| ENSG00000153774.4  | CFDP1         | chr16 | 75327595  | 10.432         | 24.336         | T2D    |
| ENSG00000227117.2  | CTA-85E5.10   | chr22 | 30404730  | 8.409          | 15.734         | T2D    |
| ENSG00000163257.6  | DCAF16        | chr4  | 17802277  | 15.276         | 20.505         | BW     |
| ENSG00000254135.1  | RP11-32D16.1  | chr5  | 157912197 | 7.886          | 9.454          | BW     |
| ENSG00000146535.9  | GNA12         | chr7  | 2767745   | 7.886          | 8.225          | BW     |
| ENSG00000106635.3  | BCL7B         | chr7  | 72950685  | 10.237         | 12.136         | BW     |
| ENSG0000029534.15  | ANK1          | chr8  | 41510738  | 10.886         | 8.513          | BW     |
| ENSG00000226752.3  | PSMD5-AS1     | chr9  | 123587105 | 8.066          | 140.174        | BW     |
| ENSG00000213277.3  | MARCKSL1P1    | chr10 | 104935310 | 7.456          | 9.845          | BW     |
| ENSG00000107679.10 | PLEKHA1       | chr10 | 124134211 | 7.745          | 7.278          | BW     |
| ENSG00000182511.7  | FES           | chr15 | 91426924  | 7.770          | 10.397         | BW     |
| ENSG00000181885.14 | CLDN7         | chr17 | 7163259   | 15.041         | 16.767         | BW     |
| ENSG00000175826.7  | CTDNEP1       | chr17 | 7146909   | 15.041         | 9.632          | BW     |
| ENSG00000170291.10 | ELP5          | chr17 | 7155400   | 15.041         | 14.102         | BW     |
| ENSG00000264920.1  | RP11-6N17.4   | chr17 | 45968620  | 7.337          | 18.426         | BW     |
| ENSG00000175730.7  | BAK1P1        | chr20 | 31276722  | 11.114         | 13.738         | BW     |
| ENSG00000183762.8  | KREMEN1       | chr22 | 29469065  | 8.000          | 22.178         | BW     |

**Supplementary Table 7. Gene ontology (GO) terms enriched for SNP-annotated genes with FDR ≤ 0.05**

| <b>Traits</b> | <b>Pathway ID</b> | <b>Pathway description</b>                              | <b>Gene count</b>        | <b>FDR</b> |          |
|---------------|-------------------|---------------------------------------------------------|--------------------------|------------|----------|
| T2DM          | GO:0097110        | scaffold protein binding                                | 6                        | 9.62E-04   |          |
|               | GO:0010817        | regulation of hormone levels                            | 13                       | 3.04E-03   |          |
|               | GO:0050796        | regulation of insulin secretion                         | 8                        | 4.19E-03   |          |
|               | GO:0032409        | regulation of transporter activity                      | 9                        | 4.43E-03   |          |
|               | GO:0046883        | regulation of hormone secretion                         | 9                        | 4.95E-03   |          |
|               | GO:0031016        | pancreas development                                    | 6                        | 5.32E-03   |          |
|               | GO:0009746        | response to hexose                                      | 7                        | 5.56E-03   |          |
|               | GO:0090276        | regulation of peptide hormone secretion                 | 8                        | 5.67E-03   |          |
|               | GO:0009749        | response to glucose                                     | 7                        | 5.96E-03   |          |
|               | GO:0034284        | response to monosaccharide                              | 7                        | 6.11E-03   |          |
|               | GO:2001257        | regulation of cation channel activity                   | 7                        | 6.74E-03   |          |
|               | GO:0032412        | regulation of ion transmembrane transporter activity    | 8                        | 6.92E-03   |          |
|               | GO:0051049        | regulation of transport                                 | 21                       | 6.93E-03   |          |
|               | GO:1901700        | response to oxygen-containing compound                  | 19                       | 7.33E-03   |          |
|               | GO:0022898        | regulation of cation transmembrane transport            | 9                        | 7.42E-03   |          |
|               | GO:0022898        | regulation of transmembrane transporter activity        | 8                        | 7.43E-03   |          |
|               | GO:0048878        | chemical homeostasis                                    | 16                       | 7.44E-03   |          |
|               | GO:0032879        | regulation of localization                              | 26                       | 8.59E-03   |          |
|               | GO:0009743        | response to carbohydrate                                | 7                        | 8.70E-03   |          |
|               | GO:0034762        | regulation of transmembrane transport                   | 11                       | 8.87E-03   |          |
|               | GO:0044057        | regulation of system process                            | 11                       | 9.81E-03   |          |
|               | GO:0051046        | regulation of secretion                                 | 13                       | 1.11E-02   |          |
|               | GO:0034765        | regulation of ion transmembrane transport               | 10                       | 1.12E-02   |          |
|               | GO:0031018        | endocrine pancreas development                          | 4                        | 1.92E-02   |          |
|               | GO:1903530        | regulation of secretion by cell                         | 12                       | 2.21E-02   |          |
|               | GO:0001890        | placenta development                                    | 6                        | 2.35E-02   |          |
|               | GO:0042592        | homeostatic process                                     | 18                       | 3.29E-02   |          |
|               | GO:0050708        | regulation of protein secretion                         | 9                        | 4.67E-02   |          |
|               | BW                | GO:0005515                                              | protein binding          | 109        | 7.86E-04 |
|               |                   | GO:0097110                                              | scaffold protein binding | 7          | 1.18E-03 |
| GO:0003674    |                   | molecular_function                                      | 136                      | 4.33E-03   |          |
| GO:0008134    |                   | transcription factor binding                            | 17                       | 4.92E-03   |          |
| GO:0005158    |                   | insulin receptor binding                                | 4                        | 1.96E-02   |          |
| GO:0009653    |                   | anatomical structure morphogenesis                      | 33                       | 2.56E-02   |          |
| GO:1901653    |                   | cellular response to peptide                            | 11                       | 2.57E-02   |          |
| GO:1901652    |                   | response to peptide                                     | 13                       | 2.58E-02   |          |
| GO:0071417    |                   | cellular response to organonitrogen compound            | 14                       | 2.58E-02   |          |
| GO:0033500    |                   | carbohydrate homeostasis                                | 9                        | 2.67E-02   |          |
| GO:0045893    |                   | positive regulation of transcription, DNA-templated     | 26                       | 2.86E-02   |          |
| GO:1901701    |                   | cellular response to oxygen-containing compound         | 20                       | 3.26E-02   |          |
| GO:0042593    |                   | glucose homeostasis                                     | 9                        | 3.41E-02   |          |
| GO:1901700    |                   | response to oxygen-containing compound                  | 25                       | 3.63E-02   |          |
| GO:0048729    |                   | tissue morphogenesis                                    | 14                       | 3.87E-02   |          |
| GO:0051254    |                   | positive regulation of RNA metabolic process            | 27                       | 3.94E-02   |          |
| GO:1902680    |                   | positive regulation of RNA biosynthetic process         | 26                       | 4.12E-02   |          |
| GO:0051240    |                   | positive regulation of multicellular organismal process | 29                       | 4.13E-02   |          |

|             |            |                                                             |     |          |
|-------------|------------|-------------------------------------------------------------|-----|----------|
|             | GO:0005488 | binding                                                     | 122 | 4.27E-02 |
|             | GO:1901699 | cellular response to nitrogen compound                      | 14  | 4.33E-02 |
|             | GO:1903508 | positive regulation of nucleic acid-templated transcription | 26  | 4.39E-02 |
|             | GO:0048568 | embryonic organ development                                 | 12  | 4.69E-02 |
|             | GO:0045944 | positive regulation of transcription by RNA polymerase II   | 21  | 5.00E-02 |
| Pleiotropic | GO:0097110 | scaffold protein binding                                    | 6   | 3.63E-06 |

**Supplementary Table 8. Conjunction cFDR for 35 pleiotropic CpG-SNPs in FG and BW (cFDR < 0.05)**

| Variant    | chr | P_FG     | P_bw     | Gene           | SNP Type              | cFDR_FG    | cFDR_BW    | ccFDR      |
|------------|-----|----------|----------|----------------|-----------------------|------------|------------|------------|
| rs1012635  | 6   | 5.13E-07 | 4.00E-10 | CDKAL1         | pleiotropic/confirmed | 0.04886625 | 0.01573    | 0.04886625 |
| rs1042725  | 12  | 0.002725 | 7.10E-32 | HMG2           | T2D/confirmed         | 2.79E-06   | 0.000144   | 0.000144   |
| rs1447351  | 11  | 2.83E-93 | 0.00023  | MTNR1B         | novel/confirmed       | 0.0291375  | 1.40E-09   | 0.0291375  |
| rs151216   | 11  | 0.003477 | 5.10E-05 | KCNQ1,KCNQ1OT1 | novel/confirmed       | 9.54E-10   | 1.20E-18   | 9.54E-10   |
| rs17361324 | 3   | 3.18E-10 | 8.00E-20 | ADCY5          | novel/confirmed       | 0.0081405  | 0.0077625  | 0.0081405  |
| rs2206734  | 6   | 8.27E-08 | 2.40E-17 | CDKAL1         | novel/confirmed       | 2.99E-09   | 0.01993333 | 0.01993333 |
| rs231354   | 11  | 5.94E-05 | 0.0028   | KCNQ1,KCNQ1OT1 | pleiotropic/confirmed | 2.05E-06   | 4.00E-09   | 2.05E-06   |
| rs340883   | 1   | 1.45E-09 | 0.0071   | PROX1-AS1      | T2D/confirmed         | 3.55E-07   | 0.01893333 | 0.01893333 |
| rs4677887  | 3   | 0.019425 | 2.30E-12 | ADCY5          | pleiotropic/confirmed | 1.65E-07   | 2.64E-16   | 1.65E-07   |
| rs569255   | 3   | 0.000243 | 0.00045  | SLC12A8        | novel/confirmed       | 0.01957829 | 0.00526    | 0.01957829 |
| rs579459   | 9   | 4.85E-05 | 8.30E-06 | ABO            | novel/confirmed       | 0.02516222 | 0.01199333 | 0.02516222 |
| rs6006393  | 22  | 0.00034  | 0.0051   | AC002378.1     | novel/confirmed       | 0.01744615 | 0.02262308 | 0.02262308 |
| rs6770420  | 3   | 8.30E-12 | 0.0046   | KLF7P1         | novel/confirmed       | 0.00070325 | 0.00014733 | 0.00070325 |
| rs7004862  | 8   | 4.00E-04 | 0.0017   | INTS8          | novel/confirmed       | 0.04133767 | 0.00349633 | 0.04133767 |
| rs7605661  | 2   | 0.002355 | 0.00039  | THADA          | novel/confirmed       | 0.00461538 | 0.02184    | 0.02184    |
| rs7723     | 7   | 0.000926 | 0.00014  | TMED4          | T2D/confirmed         | 5.15E-91   | 0.00046    | 0.00046    |
| rs7816345  | 8   | 0.000871 | 0.00042  | AC090453.1     | novel/confirmed       | 0.00545    | 3.71E-29   | 0.00545    |
| rs9289218  | 3   | 1.13E-07 | 1.80E-05 | ADCY5          | novel/confirmed       | 0.0249475  | 0.049725   | 0.049725   |
| rs16856159 | 2   | 7.51E-24 | 0.0068   |                |                       | 5.35E-21   | 0.0204     | 0.0204     |
| rs2001350  | 2   | 0.000191 | 0.0018   |                |                       | 0.01005355 | 0.02061818 | 0.02061818 |
| rs7748736  | 6   | 0.00108  | 0.0029   |                |                       | 0.04764    | 0.04575556 | 0.04764    |
| rs1059288  | 6   | 0.002113 | 0.00027  |                |                       | 0.0431052  | 0.012096   | 0.0431052  |
| rs4143341  | 7   | 0.001696 | 3.20E-06 |                |                       | 0.018232   | 0.0003032  | 0.018232   |
| rs11145756 | 9   | 2.85E-06 | 0.0015   |                |                       | 0.00021375 | 0.00792857 | 0.00792857 |
| rs3812605  | 9   | 0.000481 | 0.0042   |                |                       | 0.02704289 | 0.04456667 | 0.04456667 |
| rs17566087 | 10  | 0.003405 | 2.30E-05 |                |                       | 0.03490125 | 0.00173938 | 0.03490125 |
| rs198476   | 11  | 7.94E-05 | 0.00046  |                |                       | 0.0026996  | 0.005175   | 0.005175   |
| rs2072114  | 11  | 1.04E-15 | 0.003    |                |                       | 4.27E-13   | 0.0165     | 0.0165     |
| rs4601728  | 11  | 0.00039  | 0.0033   |                |                       | 0.0213525  | 0.03526875 | 0.03526875 |
| rs703545   | 12  | 0.007068 | 8.70E-06 |                |                       | 0.04790533 | 0.00107107 | 0.04790533 |
| rs7331478  | 13  | 2.85E-09 | 6.50E-05 |                |                       | 1.66E-07   | 0.0005525  | 0.0005525  |
| rs11074093 | 15  | 0.000352 | 0.00038  |                |                       | 0.010912   | 0.007695   | 0.010912   |
| rs4965425  | 15  | 0.006996 | 6.40E-07 |                |                       | 0.0461736  | 0.00014029 | 0.0461736  |
| rs2429243  | 17  | 4.37E-05 | 0.00092  |                |                       | 0.00250339 | 0.00893714 | 0.00893714 |
| rs6075924  | 20  | 0.003485 | 4.80E-06 |                |                       | 0.0296225  | 0.0004944  | 0.0296225  |

**Supplementary Table 9. Conjunction cFDR for 6 pleiotropic CpG-SNPs in FI and BW (cFDR < 0.05)**

| Variant    | chr | P_FI     | P_bw     | SNP Type        | Gene   | cFDR_FI    | cFDR_BW  | ccFDR      |
|------------|-----|----------|----------|-----------------|--------|------------|----------|------------|
| rs9289218  | 3   | 0.000476 | 1.80E-05 | novel/confirmed | ADCY5  | 0.017374   | 0.000792 | 0.017374   |
| rs17361324 | 3   | 0.003383 | 8.00E-20 | novel/confirmed | ADCY5  | 0.0050745  | 1.91E-17 | 0.0050745  |
| rs900399   | 3   | 0.002526 | 2.90E-41 |                 |        | 0.002526   | 1.06E-38 | 0.002526   |
| rs2206734  | 6   | 0.010898 | 2.40E-17 | novel/confirmed | CDKAL1 | 0.01453067 | 1.09E-14 | 0.01453067 |
| rs7766106  | 6   | 3.08E-05 | 2.60E-05 |                 |        | 0.0013398  | 0.000169 | 0.0013398  |
| rs703545   | 12  | 1.52E-06 | 8.70E-06 |                 |        | 9.12E-05   | 4.35E-05 | 9.12E-05   |

**Supplementary Table 10. Conjunction cFDR for 54 pleiotropic CpG-SNPs in T2D and BW\_maternal (cFDR < 0.05)**

| Variant    | chr | P_DM      | P_BW      | Gene       | SNP Type              | cFDR_DM    | cFDR_BW    | ccFDR      |
|------------|-----|-----------|-----------|------------|-----------------------|------------|------------|------------|
| rs1447351  | 11  | 6.60E-18  | 1.22E-08  | MTNR1B     | novel/confirmed       | 5.94E-17   | 2.68E-07   | 2.68E-07   |
| rs1515114  | 2   | 9.50E-17  | 0.009981  | AC062015.1 | novel/confirmed       | 1.66E-14   | 0.027725   | 0.027725   |
| rs17361324 | 3   | 1.10E-25  | 1.29E-05  | ADCY5      | novel/confirmed       | 2.97E-24   | 0.00016705 | 0.00016705 |
| rs2206734  | 6   | 4.70E-66  | 7.74E-05  | CDKAL1     | novel/confirmed       | 2.73E-64   | 0.00023226 | 0.00023226 |
| rs2488071  | 10  | 1.30E-22  | 0.0005663 | Y_RNA      | T2D/confirmed         | 8.36E-21   | 0.00302027 | 0.00302027 |
| rs340883   | 1   | 1.40E-13  | 0.005544  | PROX1-AS1  | T3D/confirmed         | 1.36E-11   | 0.019404   | 0.019404   |
| rs4677887  | 3   | 0.0011    | 0.0001349 | ADCY5      | pleiotropic/confirmed | 0.0053625  | 0.00738578 | 0.00738578 |
| rs9289218  | 3   | 3.60E-17  | 5.01E-16  | ADCY5      | novel/confirmed       | 3.60E-17   | 1.15E-14   | 1.15E-14   |
| rs934227   | 2   | 1.40E-09  | 2.03E-05  |            |                       | 1.01E-08   | 0.00027148 | 0.00027148 |
| rs2580770  | 2   | 0.00021   | 0.003075  |            |                       | 0.00434    | 0.04930603 | 0.04930603 |
| rs175238   | 2   | 0.0011    | 7.63E-05  |            |                       | 0.00447857 | 0.00476813 | 0.00476813 |
| rs10190207 | 2   | 0.0036    | 0.0005613 |            |                       | 0.02973913 | 0.03628927 | 0.03628927 |
| rs12631028 | 3   | 2.00E-08  | 9.40E-06  |            |                       | 1.30E-07   | 0.00021843 | 0.00021843 |
| rs1826215  | 3   | 3.80E-05  | 1.76E-05  |            |                       | 0.00014356 | 0.00056061 | 0.00056061 |
| rs6440003  | 3   | 7.50E-07  | 2.51E-07  |            |                       | 2.44E-06   | 8.90E-06   | 8.90E-06   |
| rs3852060  | 3   | 1.60E-09  | 0.003731  |            |                       | 1.06E-07   | 0.02374273 | 0.02374273 |
| rs7657332  | 4   | 0.0027    | 0.00067   |            |                       | 0.023004   | 0.0340896  | 0.0340896  |
| rs4146009  | 4   | 0.0022    | 0.0007345 |            |                       | 0.019536   | 0.03402204 | 0.03402204 |
| rs6827183  | 4   | 0.0031    | 0.0001024 |            |                       | 0.01298125 | 0.008736   | 0.01298125 |
| rs7715701  | 5   | 0.017     | 4.16E-05  |            |                       | 0.0499375  | 0.01007051 | 0.0499375  |
| rs7701346  | 5   | 3.80E-07  | 8.81E-07  |            |                       | 1.43E-06   | 2.95E-05   | 2.95E-05   |
| rs1650504  | 5   | 1.90E-05  | 0.001422  |            |                       | 0.00041563 | 0.02141888 | 0.02141888 |
| rs2842363  | 6   | 1.80E-09  | 0.002199  |            |                       | 7.95E-08   | 0.01459336 | 0.01459336 |
| rs13220047 | 6   | 0.006     | 0.0004588 |            |                       | 0.04175    | 0.03765983 | 0.04175    |
| rs1415701  | 6   | 4.20E-05  | 0.0004987 |            |                       | 0.000534   | 0.01040146 | 0.01040146 |
| rs6918311  | 6   | 2.10E-11  | 0.01142   |            |                       | 3.10E-09   | 0.04663167 | 0.04663167 |
| rs2392244  | 7   | 0.0041    | 6.29E-05  |            |                       | 0.01522857 | 0.00718179 | 0.01522857 |
| rs1127065  | 7   | 2.20E-08  | 0.001289  |            |                       | 6.52E-07   | 0.01113227 | 0.01113227 |
| rs10758593 | 9   | 1.60E-10  | 8.98E-07  |            |                       | 8.53E-10   | 1.68E-05   | 1.68E-05   |
| rs2811709  | 9   | 3.40E-05  | 0.001777  |            |                       | 0.00075337 | 0.02590679 | 0.02590679 |
| rs2383208  | 9   | 2.60E-67  | 0.001181  |            |                       | 4.00E-65   | 0.001181   | 0.001181   |
| rs10983319 | 9   | 0.0021    | 0.0005646 |            |                       | 0.01823182 | 0.02917955 | 0.02917955 |
| rs7904519  | 10  | 1.70E-135 | 0.0006389 |            |                       | 3.49E-133  | 0.0006389  | 0.0006389  |
| rs1225404  | 10  | 2.80E-20  | 0.004352  |            |                       | 3.80E-18   | 0.01450667 | 0.01450667 |
| rs2334499  | 11  | 3.60E-05  | 0.001989  |            |                       | 0.00081    | 0.0280449  | 0.0280449  |



|            |    |          |           |            |            |            |
|------------|----|----------|-----------|------------|------------|------------|
| rs2762954  | 11 | 8.90E-07 | 0.00199   | 2.51E-05   | 0.01815875 | 0.01815875 |
| rs474901   | 11 | 0.0065   | 7.76E-06  | 0.0186875  | 0.00203383 | 0.0186875  |
| rs7102746  | 11 | 2.80E-06 | 0.005975  | 0.00013185 | 0.0478     | 0.0478     |
| rs12819124 | 12 | 2.20E-05 | 0.003385  | 0.0007403  | 0.0423125  | 0.0423125  |
| rs1826535  | 12 | 4.50E-05 | 0.0003167 | 0.00047769 | 0.00725974 | 0.00725974 |
| rs17331697 | 12 | 3.20E-05 | 0.0003115 | 0.00039855 | 0.00775918 | 0.00775918 |
| rs6489844  | 12 | 0.00023  | 3.40E-06  | 0.00065714 | 0.00023911 | 0.00065714 |
| rs3184504  | 12 | 2.30E-07 | 1.22E-14  | 2.30E-07   | 7.87E-13   | 2.30E-07   |
| rs1054852  | 12 | 3.10E-09 | 0.005067  | 2.03E-07   | 0.02859236 | 0.02859236 |
| rs10781628 | 12 | 0.00026  | 0.001917  | 0.00441    | 0.03782388 | 0.03782388 |
| rs9593509  | 13 | 0.0051   | 5.03E-05  | 0.01748571 | 0.00652662 | 0.01748571 |
| rs8022758  | 14 | 0.00021  | 2.56E-05  | 0.000665   | 0.00100092 | 0.00100092 |
| rs12442879 | 15 | 9.20E-05 | 1.49E-05  | 0.00031689 | 0.00059931 | 0.00059931 |
| rs7343010  | 18 | 1.80E-05 | 0.0003404 | 0.00023564 | 0.00736502 | 0.00736502 |
| rs3803915  | 19 | 8.80E-05 | 0.00193   | 0.00169878 | 0.03004087 | 0.03004087 |
| rs7248104  | 19 | 0.0073   | 4.52E-06  | 0.0191625  | 0.00125827 | 0.0191625  |
| rs7246440  | 19 | 3.60E-05 | 0.002804  | 0.00090313 | 0.03474522 | 0.03474522 |
| rs2304130  | 19 | 1.90E-15 | 0.001429  | 8.41E-14   | 0.00464425 | 0.00464425 |
| rs2708742  | 19 | 0.00061  | 0.0002167 | 0.00431067 | 0.00980929 | 0.00980929 |

**Supplementary Table 11. Conditional FDR value of 133 CpG-SNPs for BW\_fetal given the DM (cFDR < 0.05)**

| Variant    | Chr | Gene               | SnP Type            | P         | cFDR       |
|------------|-----|--------------------|---------------------|-----------|------------|
| rs1012635  | 6   | CDKAL1             | confirmed/confirmed | 3.27E-11  | 1.80E-10   |
| rs1042725  | 12  | HMGA2              | novel/confirmed     | 6.72E-21  | 9.75E-20   |
| rs10840346 | 11  | SBF2               | novel/confirmed     | 1.93E-06  | 0.00040448 |
| rs10878353 | 12  | HMGA2              | novel/confirmed     | 1.17E-07  | 1.30E-05   |
| rs10878359 | 12  | MIR6074            | novel/confirmed     | 6.02E-11  | 2.63E-08   |
| rs11264298 | 1   | DCST1              | novel/confirmed     | 0.0002617 | 0.03691187 |
| rs12306172 | 12  | SMUG1,SMUG1-AS1    | novel/confirmed     | 3.96E-06  | 0.00736571 |
| rs12623454 | 2   | AC073257.1         | novel/confirmed     | 8.48E-06  | 0.00016646 |
| rs12677785 | 8   | SLC45A4            | novel/confirmed     | 1.82E-05  | 0.0219353  |
| rs12704091 | 7   | ZNF783             | novel/confirmed     | 6.46E-05  | 0.03083022 |
| rs12865243 | 13  | LINC00598          | novel/confirmed     | 0.001429  | 0.03875112 |
| rs12939237 | 17  | IGF2BP1            | novel/confirmed     | 6.15E-05  | 0.0040557  |
| rs137848   | 22  | IL17REL            | novel/confirmed     | 8.56E-05  | 0.00066145 |
| rs1415181  | 1   | GAPDHP24           | novel/confirmed     | 1.94E-05  | 0.02138222 |
| rs151216   | 11  | KCNQ1,KCNQ1OT1     | novel/confirmed     | 0.0005676 | 0.00502108 |
| rs1515114  | 2   | AC062015.1         | novel/confirmed     | 8.29E-06  | 2.96E-05   |
| rs1547669  | 6   | MLN                | novel/confirmed     | 1.52E-06  | 0.001656   |
| rs163177   | 11  | KCNQ1              | novel/confirmed     | 0.003422  | 0.013688   |
| rs17361324 | 3   | ADCY5              | novel/confirmed     | 2.80E-26  | 3.64E-25   |
| rs17401675 | 7   | MLXIPL             | novel/confirmed     | 5.34E-10  | 6.74E-08   |
| rs17689040 | 7   | SUGCT              | novel/confirmed     | 0.0003883 | 0.02320925 |
| rs1886843  | 20  | STX16,STX16-NPEPL1 | novel/confirmed     | 6.68E-06  | 0.00281015 |
| rs2000244  | 9   | STRBP              | novel/confirmed     | 2.20E-06  | 7.30E-05   |
| rs2206734  | 6   | CDKAL1             | novel/confirmed     | 1.86E-19  | 5.57E-19   |
| rs2236407  | 9   | PTCH1              | novel/confirmed     | 1.57E-07  | 1.62E-05   |
| rs2426778  | 20  | NPEPL1             | novel/confirmed     | 6.77E-05  | 0.04231615 |
| rs2488071  | 10  | Y_RNA              | novel/confirmed     | 4.86E-09  | 1.56E-08   |
| rs2745929  | 6   | CDKAL1             | novel/confirmed     | 1.39E-09  | 5.55E-09   |
| rs2886070  | 1   | ARHGEF2            | novel/confirmed     | 3.83E-07  | 0.00090853 |
| rs2894593  | 2   | AC062015.1         | novel/confirmed     | 0.001014  | 0.002873   |
| rs3213225  | 11  | IGF2,INS-IGF2      | novel/confirmed     | 2.82E-10  | 1.88E-08   |
| rs340883   | 1   | PROX1-AS1          | novel/confirmed     | 0.0003724 | 0.00144822 |
| rs390200   | 17  | DLG4               | novel/confirmed     | 2.37E-08  | 3.67E-05   |
| rs452674   | 13  | LINC00598          | novel/confirmed     | 0.0002213 | 0.01337943 |
| rs4625714  | 16  | LPCAT2             | novel/confirmed     | 7.11E-05  | 0.02681838 |
| rs4677887  | 3   | ADCY5              | confirmed/confirmed | 0.0003492 | 0.01456663 |
| rs4677889  | 3   | ADCY5              | novel/confirmed     | 1.05E-05  | 0.00147809 |
| rs492602   | 19  | FUT2               | novel/confirmed     | 6.51E-06  | 0.01085498 |
| rs4965425  | 15  | AC118658.1         | novel/confirmed     | 1.76E-06  | 0.00393077 |
| rs4980661  | 11  | AP000439.2         | novel/confirmed     | 9.89E-06  | 0.00659886 |
| rs6016377  | 20  | MAFB               | confirmed/confirmed | 1.41E-08  | 2.30E-05   |
| rs6057610  | 20  | C20orf203          | novel/confirmed     | 1.05E-09  | 8.45E-07   |
| rs6075924  | 20  | LINC00261          | novel/confirmed     | 7.58E-06  | 0.00628746 |
| rs6770420  | 3   | KLF7P1             | novel/confirmed     | 0.002812  | 0.00723086 |
| rs7004862  | 8   | INTS8              | novel/confirmed     | 0.001778  | 0.01012092 |

|            |    |            |                 |           |            |
|------------|----|------------|-----------------|-----------|------------|
| rs7088711  | 10 | WBP1L      | novel/confirmed | 9.90E-05  | 0.02317354 |
| rs7331478  | 13 | PDX1       | novel/confirmed | 8.00E-06  | 0.00719778 |
| rs7561273  | 2  | MFSD2B     | novel/confirmed | 5.88E-06  | 0.01162883 |
| rs7605661  | 2  | THADA      | novel/confirmed | 0.007443  | 0.0302682  |
| rs7766106  | 6  | RSPO3      | novel/confirmed | 0.0005544 | 0.0422037  |
| rs7816345  | 8  | AC090453.1 | novel/confirmed | 0.002037  | 0.03783    |
| rs7965495  | 12 | RPL21P18   | novel/confirmed | 3.64E-06  | 0.00010424 |
| rs8182579  | 19 | PEPD       | novel/confirmed | 0.0001873 | 0.00181057 |
| rs855715   | 10 | ADRB1      | novel/confirmed | 1.12E-05  | 0.00390828 |
| rs900399   | 3  | LINC00880  | novel/confirmed | 1.55E-37  | 5.44E-34   |
| rs926345   | 20 | PLCG1      | novel/confirmed | 1.36E-05  | 0.00091218 |
| rs9289218  | 3  | ADCY5      | novel/confirmed | 9.89E-17  | 7.58E-16   |
| rs935172   | 2  | CIB4       | novel/confirmed | 0.0001418 | 0.01920556 |
| rs9416062  | 10 | LRMDA      | novel/confirmed | 0.007054  | 0.04856408 |
| rs4655772  | 1  |            |                 | 0.0004808 | 0.04171463 |
| rs17407594 | 1  |            |                 | 1.91E-05  | 0.00838113 |
| rs2884428  | 1  |            |                 | 9.98E-07  | 0.00240745 |
| rs13020622 | 2  |            |                 | 1.08E-05  | 0.00099688 |
| rs10865186 | 2  |            |                 | 0.0001158 | 0.03633099 |
| rs895514   | 2  |            |                 | 0.0002029 | 0.02075471 |
| rs6749108  | 2  |            |                 | 0.0003793 | 0.01269657 |
| rs4664054  | 2  |            |                 | 0.0001046 | 0.04485819 |
| rs853770   | 2  |            |                 | 1.78E-06  | 0.00387095 |
| rs16856159 | 2  |            |                 | 5.42E-05  | 0.02007762 |
| rs1801123  | 2  |            |                 | 0.0003899 | 0.03399758 |
| rs332353   | 3  |            |                 | 0.003545  | 0.0328976  |
| rs13075511 | 3  |            |                 | 0.0006302 | 0.018906   |
| rs3852060  | 3  |            |                 | 0.002468  | 0.01328923 |
| rs7657332  | 4  |            |                 | 2.54E-05  | 0.00170314 |
| rs1460554  | 4  |            |                 | 0.0008588 | 0.03377947 |
| rs7666523  | 4  |            |                 | 2.06E-05  | 0.01891119 |
| rs10512645 | 5  |            |                 | 1.40E-05  | 0.0278654  |
| rs12658884 | 5  |            |                 | 1.66E-05  | 0.02684736 |
| rs13180312 | 5  |            |                 | 0.0001105 | 0.03770582 |
| rs17056278 | 5  |            |                 | 0.0002935 | 0.03992283 |
| rs16884481 | 6  |            |                 | 0.001217  | 0.02822281 |
| rs1466339  | 6  |            |                 | 0.004848  | 0.02477867 |
| rs9368716  | 6  |            |                 | 0.00705   | 0.048222   |
| rs13219530 | 6  |            |                 | 0.0001734 | 0.038135   |
| rs4236049  | 6  |            |                 | 0.0002469 | 0.04212803 |
| rs13220047 | 6  |            |                 | 0.0007954 | 0.04123521 |
| rs1262557  | 6  |            |                 | 3.13E-06  | 1.72E-05   |
| rs9457107  | 6  |            |                 | 1.07E-05  | 0.01209444 |
| rs2934849  | 6  |            |                 | 6.75E-05  | 0.02081225 |
| rs38205    | 7  |            |                 | 0.001059  | 0.024357   |
| rs6948977  | 7  |            |                 | 0.0002126 | 0.03499508 |
| rs2392244  | 7  |            |                 | 0.0001059 | 0.00736235 |
| rs1127065  | 7  |            |                 | 0.002815  | 0.01573088 |

|            |    |           |            |
|------------|----|-----------|------------|
| rs10265057 | 7  | 9.28E-07  | 0.00042795 |
| rs42042    | 7  | 1.48E-05  | 0.00648605 |
| rs10487687 | 7  | 7.50E-05  | 0.04762364 |
| rs7016707  | 8  | 0.006436  | 0.04994336 |
| rs551580   | 8  | 3.07E-05  | 0.00695603 |
| rs13255921 | 8  | 0.0005765 | 0.02419165 |
| rs7460241  | 8  | 1.80E-05  | 0.02264809 |
| rs10758593 | 9  | 6.16E-08  | 4.31E-07   |
| rs10992100 | 9  | 6.24E-05  | 0.03037422 |
| rs357542   | 9  | 2.77E-05  | 0.00127327 |
| rs17301196 | 9  | 0.0002614 | 0.01143281 |
| rs11145846 | 9  | 0.003154  | 0.0184509  |
| rs11145756 | 9  | 0.001304  | 0.010758   |
| rs3812605  | 9  | 0.0009563 | 0.02798217 |
| rs11009689 | 10 | 0.001576  | 0.03594297 |
| rs2782979  | 10 | 0.00143   | 0.02403762 |
| rs2292623  | 10 | 0.003152  | 0.04919371 |
| rs3213223  | 11 | 3.84E-06  | 0.00072623 |
| rs7483056  | 11 | 7.28E-05  | 0.01885261 |
| rs9669403  | 12 | 0.000226  | 0.00652741 |
| rs10878361 | 12 | 3.41E-05  | 0.00500507 |
| rs7336104  | 13 | 0.0001887 | 0.0145299  |
| rs9593509  | 13 | 0.000256  | 0.01604855 |
| rs4899027  | 14 | 0.0002498 | 0.01131988 |
| rs8022758  | 14 | 0.000625  | 0.01542763 |
| rs11160605 | 14 | 1.65E-05  | 0.00235233 |
| rs12442879 | 15 | 0.002313  | 0.03640461 |
| rs7178220  | 15 | 1.82E-05  | 0.00565695 |
| rs208569   | 16 | 0.0002637 | 0.04940443 |
| rs13336802 | 16 | 8.31E-05  | 0.02231026 |
| rs1242507  | 17 | 0.0003098 | 0.02684662 |
| rs7220080  | 17 | 2.36E-06  | 0.00239079 |
| rs11658711 | 17 | 0.0001492 | 0.03589127 |
| rs7248104  | 19 | 3.01E-05  | 0.00305272 |
| rs3786913  | 19 | 0.001317  | 0.01293759 |
| rs2303088  | 19 | 3.83E-05  | 0.03451953 |
| rs205894   | 20 | 0.0001576 | 0.04472151 |
| rs6119294  | 20 | 2.06E-06  | 0.00367933 |
| rs2766673  | 20 | 0.002079  | 0.04934889 |
| rs911303   | 20 | 0.008403  | 0.02881029 |
